# Supplementary material for: Personally Tailored Survival Prediction of Patients With Follicular Lymphoma Using Machine Learning Transcriptome-Based Models
Source: Front Oncol. 2022 Jan 10;11:705010. doi: 10.3389/fonc.2021.705010 (PMC8784530; doi:10.3389/fonc.2021.705010)
Supplement: Supplementary Table 1 — Association between the expression of the top 100 genes and overall survival (univariate cox regression). [file Table_1.xlsx]

## Sheet: Hoja 1
Gene ID	P-val	HR	Low 95% CI	High 95% CI	Schoenfeld's p-value	Q-value
UBE2E1	2.25747e-05	2.33491e-14	1.15775e-20	4.70897e-08	0.00422415	0.334596
KSR2	0.000100694	0.00691273	0.000563456	0.0848085	0.124347	0.334596
MAT1A	0.000101517	623.02	24.288	15981.3	0.781538	0.334596
SNN	0.000140876	2.28827e-05	9.33684e-08	0.0056081	0.993225	0.334596
ANKRD2	0.00017725	54.5671	6.7448	441.461	0.625193	0.334596
ANGPTL4	0.000189127	168.58	11.4205	2488.43	0.0520657	0.334596
EMR1	0.000197762	138.877	10.3348	1866.21	0.0292188	0.334596
MMAA	0.00023673	0.000418034	6.60412e-06	0.0264612	0.278495	0.334596
C1orf174	0.000240683	0.000883264	2.07027e-05	0.0376837	0.134224	0.334596
C2orf73	0.00024152	43.2859	5.79048	323.578	0.0846701	0.334596
EPS15	0.000250305	0.000490331	8.30154e-06	0.0289615	0.142081	0.334596
FAM150B	0.000269799	9.30861	2.80268	30.917	0.218049	0.334596
EVI5L	0.000371532	2.15159e-06	1.63016e-09	0.0028398	0.121973	0.425318
WDR82	0.000445805	3.49796e-09	6.66454e-14	0.000183594	0.795444	0.473891
SLC2A4RG	0.000518364	0.000237319	2.13131e-06	0.0264252	0.434662	0.500199
ARHGDIB	0.000596934	3.26448e-210	0	1.29797e-90	0.28469	0.500199
CACNG3	0.000597013	34.1978	4.55199	256.918	0.0926241	0.500199
CCDC28A	0.00062233	0.000855207	1.49535e-05	0.0489101	0.929547	0.500199
TMEM92	0.000638609	94.5751	6.94563	1287.78	0.610672	0.500199
PTH1R	0.000710921	277.818	10.6888	7220.96	0.728419	0.528996
RFTN1	0.000794237	3.37384e-35	2.44739e-55	4.65099e-15	0.953878	0.56285
ECHDC1	0.000833983	0.000201222	1.36595e-06	0.0296426	0.253953	0.564151
CXCL6	0.00100255	66.0717	5.44137	802.275	0.863145	0.624258
BAG1	0.00101642	158.402	7.72093	3249.74	0.429848	0.624258
MAP3K7	0.00111734	0.00143426	2.79718e-05	0.0735424	0.0446697	0.624258
TOP2B	0.00113294	3.32304e-06	1.67104e-09	0.00660824	0.567176	0.624258
HP	0.00114983	16.7311	3.06122	91.4436	0.818406	0.624258
CORO1A	0.00123762	3.15622e-12	3.31591e-19	3.00422e-05	0.368089	0.624258
ZDHHC19	0.00128578	158.259	7.24916	3455.02	0.668579	0.624258
ATAD1	0.00136538	0.00016944	8.33069e-07	0.0344629	0.970974	0.624258
CD5L	0.00141576	8.45938	2.27943	31.3942	0.215872	0.624258
CMPK1	0.0014336	5.99402e-07	8.95479e-11	0.00401219	0.279699	0.624258
GZMH	0.00153753	12.1036	2.58725	56.6231	0.0399546	0.624258
MYL7	0.00154916	429.373	10.0596	18326.8	0.450885	0.624258
CPNE6	0.00165002	66.8433	4.87949	915.674	0.154326	0.624258
CCNDBP1	0.00165155	0.00075892	8.64871e-06	0.0665948	0.828172	0.624258
MAP4K4	0.00166562	0.00049018	4.23874e-06	0.0566858	0.716991	0.624258
NDUFS7	0.0016976	0.00177781	3.40812e-05	0.0927371	0.0376073	0.624258
SEMA4G	0.0017419	120.771	6.00756	2427.89	0.741841	0.624258
MEF2C	0.00177977	0.00217974	4.66587e-05	0.101831	0.0582659	0.624258
CRELD2	0.00185613	236.819	7.57095	7407.7	0.199598	0.624258
DLST	0.00188206	0.00024699	1.31222e-06	0.0464889	0.207447	0.624258
STAT5B	0.00189986	0.000754077	8.06568e-06	0.0705002	0.285127	0.624258
AVEN	0.00205511	237.152	7.32367	7679.36	0.143688	0.624258
CEACAM7	0.0020728	623.664	10.3788	37476.2	0.794764	0.624258
CLIP1	0.0021119	0.002739	6.36548e-05	0.117856	0.418739	0.624258
CHAC1	0.00212495	88.2609	5.06322	1538.54	0.656133	0.624258
C3orf20	0.00215036	7.83966	2.10427	29.2073	0.0741892	0.624258
C10orf53	0.00218499	64.7279	4.49293	932.508	0.633723	0.624258
PUM1	0.00223371	3.97842e-06	1.37298e-09	0.0115281	0.116498	0.624258
KDM3B	0.00235524	5.78889e-05	1.07608e-07	0.0311421	0.84204	0.624258
TMEM207	0.00242128	84.1501	4.79803	1475.86	0.731496	0.624258
FER	0.00248722	0.0124785	0.000728752	0.21367	0.92103	0.624258
TRPC3	0.00251865	89.7224	4.85217	1659.07	0.738812	0.624258
GPBP1L1	0.00252181	6.46507e-06	2.77623e-09	0.0150553	0.396243	0.624258
HOXD12	0.0025988	43570.6	41.6848	4.55416e+07	0.629213	0.624258
PNRC1	0.0026151	0.0111841	0.000599538	0.208634	0.383926	0.624258
MLH1	0.00264491	0.00071753	6.39682e-06	0.0804851	0.869505	0.624258
MRPS30	0.0027684	135.859	5.44418	3390.34	0.992311	0.624258
SRI	0.00277884	2727.9	15.2941	486556	0.371636	0.624258
REEP2	0.0027934	182.607	6.0101	5548.24	0.0824425	0.624258
MALL	0.00293634	0.0535708	0.00778648	0.368566	0.381338	0.624258
LRPPRC	0.00309084	164.564	5.59851	4837.24	0.536872	0.624258
FAM76B	0.00310154	0.00873979	0.000377841	0.202159	0.342282	0.624258
ASF1A	0.00312938	0.0175087	0.00119661	0.256187	0.153433	0.624258
TPP2	0.00314358	0.00182257	2.77174e-05	0.119843	0.972943	0.624258
INPP5J	0.00317422	14.4602	2.4516	85.2904	0.251817	0.624258
CD247	0.00319886	0.00164192	2.31187e-05	0.116612	0.801334	0.624258
TBX6	0.00328458	431.833	7.55671	24677.4	0.490248	0.624258
EFNB3	0.00331657	10.301	2.17217	48.8498	0.218144	0.624258
SETD2	0.00331781	4.21888e-05	5.07442e-08	0.0350759	0.00754054	0.624258
AOC2	0.00333467	180.219	5.61614	5783.16	0.0142437	0.624258
LRPAP1	0.00340225	269.999	6.3725	11439.7	0.476753	0.624258
PRDX4	0.00356117	465.822	7.48088	29005.9	0.225127	0.624258
CPSF2	0.00358974	0.000638495	4.51771e-06	0.0902396	0.778522	0.624258
EGLN1	0.00360182	0.00619773	0.000202205	0.189964	0.477169	0.624258
PPM1M	0.00365259	2.33507e-06	3.72303e-10	0.0146455	0.558501	0.624258
OSTF1	0.00370518	0.000224025	7.68315e-07	0.065321	0.615726	0.624258
GSX1	0.00374228	0.0127233	0.000665575	0.24322	0.62434	0.624258
HECA	0.00382489	0.000830653	6.78944e-06	0.101626	0.891949	0.624258
TMEM30A	0.00384184	0.000559554	3.49081e-06	0.0896929	0.934906	0.624258
MPP7	0.00386021	0.0523902	0.00708713	0.387285	0.619526	0.624258
PHOSPHO1	0.00386644	178.045	5.29229	5989.86	0.455642	0.624258
CCL8	0.00389393	12.8938	2.27224	73.1656	0.00539092	0.624258
C3AR1	0.00394785	34.8722	3.11597	390.27	0.542738	0.624258
REG1A	0.00396985	62.0265	3.7401	1028.66	0.117696	0.624258
CNP	0.00408549	221.57	5.55336	8840.3	0.233139	0.624258
CD2	0.00412836	0.00162048	2.00846e-05	0.130745	0.929016	0.624258
MED6	0.00420453	0.00131197	1.39471e-05	0.123414	0.7342	0.624258
TBC1D4	0.00427127	0.00983463	0.000412989	0.234195	0.0676502	0.624258
GNRH2	0.0043505	67.0081	3.72371	1205.81	0.256531	0.624258
HLA-DQB2	0.00440154	0.0502416	0.00641361	0.393572	0.214919	0.624258
RPS8	0.00440733	74.9364	3.83965	1462.49	0.635117	0.624258
DUS3L	0.00443849	0.118277	0.0271802	0.514696	0.239646	0.624258
EAPP	0.00449949	0.00047372	2.40926e-06	0.0931451	0.607195	0.624258
FNDC1	0.0045026	0.0999291	0.020394	0.489646	0.121564	0.624258
CBR4	0.00450703	0.000376339	1.63134e-06	0.0868189	0.01422	0.624258
RAB40A	0.00453997	19.9088	2.5229	157.105	0.234269	0.624258
KATNA1	0.00460757	0.00329747	6.32897e-05	0.171802	0.0786635	0.624258
RBM23	0.00462079	1.94954e-07	4.43213e-12	0.00857539	0.568863	0.624258
CDX4	0.00462847	98.0597	4.10331	2343.4	0.960255	0.624258
RAF1	0.00467237	0.0042852	9.80063e-05	0.187365	0.430668	0.624258
PXMP4	0.00468923	142.85	4.58391	4451.65	0.43525	0.624258
CCDC115	0.0046957	0.00124927	1.21313e-05	0.128649	0.162317	0.624258
TINF2	0.00470864	0.00174616	2.13576e-05	0.142762	0.529372	0.624258
SIAH2	0.00476643	0.00646459	0.000195037	0.214272	0.464507	0.624258
KRT76	0.00483703	203.838	5.0462	8233.91	0.549459	0.624258
KRT4	0.00490108	100.49	4.04921	2493.89	0.880262	0.624258
SV2C	0.00490119	72.4961	3.6673	1433.12	0.277323	0.624258
TBX21	0.00492587	86.1525	3.85754	1924.09	0.0487865	0.624258
TUT1	0.0049332	57.867	3.41774	979.77	0.6952	0.624258
FKBP11	0.00496511	395.441	6.09774	25644.5	0.0220549	0.624258
LOXHD1	0.00505656	109.838	4.11139	2934.36	0.454129	0.624258
GIMAP7	0.00508424	0.00457405	0.000105561	0.198197	0.605993	0.624258
ALDH3B2	0.00511297	113.05	4.12971	3094.73	0.147109	0.624258
BCLAF1	0.00518291	0.00215318	2.90552e-05	0.159564	0.0178208	0.624258
PLEKHB1	0.00520285	62.5358	3.43757	1137.64	0.958407	0.624258
PYCR1	0.005206	60.4869	3.40286	1075.17	0.42798	0.624258
TRMT112	0.00526909	4.78827e-08	3.45324e-13	0.00663942	0.187478	0.624258
SCRT1	0.00527266	0.00611022	0.000170101	0.219486	0.849301	0.624258
ALX3	0.00531402	33.1918	2.82813	389.549	0.149926	0.624258
IL1RL2	0.00531964	46.1171	3.11711	682.293	0.778623	0.624258
PHIP	0.00536376	0.00269989	4.19958e-05	0.173575	0.778256	0.624258
LAMB4	0.00541537	221.356	4.92581	9947.28	0.380555	0.624258
PRPSAP2	0.00545452	0.00266493	4.07388e-05	0.174326	0.287594	0.624258
CD99	0.00548792	0.000687826	4.03035e-06	0.117385	0.815022	0.624258
ZSWIM1	0.00564076	584350	48.2345	7.07928e+09	0.356862	0.624258
PGLYRP4	0.00565833	212.351	4.77189	9449.72	0.358171	0.624258
KLHL36	0.0056796	2.82948e-06	3.31013e-10	0.0241862	0.748382	0.624258
TAS2R4	0.00582697	128.173	4.06959	4036.84	0.458135	0.624258
SSR4	0.0058934	65365.8	24.4307	1.7489e+08	0.516107	0.624258
LSM1	0.00596737	556062	44.653	6.92461e+09	0.73687	0.624258
SLC35C1	0.00605609	339.959	5.29393	21831.1	0.218682	0.624258
THOC6	0.00606594	0.0637913	0.00893502	0.455435	0.305118	0.624258
MBD4	0.00608117	0.00319573	5.2692e-05	0.193818	0.00174649	0.624258
NRP2	0.00610854	579.051	6.13579	54646.6	0.330131	0.624258
AADACL2	0.0061574	22.8767	2.43637	214.806	0.494731	0.624258
NBPF20	0.00621141	534.835	5.94457	48119.3	0.117017	0.624258
SACM1L	0.00630161	2.37186e-05	1.13951e-08	0.0493696	0.110075	0.624258
TNNC1	0.0063088	22.8363	2.41924	215.562	0.713256	0.624258
DGCR11	0.00639995	21.549	2.37084	195.863	0.409224	0.624258
GTPBP10	0.00645635	237.004	4.63302	12124.1	0.572475	0.624258
RXRG	0.00647056	63.4918	3.1998	1259.83	0.445198	0.624258
IER3IP1	0.00649063	969.23	6.85473	137045	0.159406	0.624258
PCSK7	0.00657217	0.00674807	0.000183511	0.24814	0.509304	0.624258
C3orf52	0.00659281	14.2868	2.09759	97.3088	0.339002	0.624258
LILRB5	0.00660771	22.4949	2.37886	212.715	0.347561	0.624258
ASB12	0.00669653	46.623	2.90075	749.358	0.226949	0.624258
ZNF226	0.00671644	0.000199463	4.21091e-07	0.094482	0.397445	0.624258
MUC7	0.00676516	11.4658	1.96198	67.0062	0.724265	0.624258
LIMK1	0.00678225	0.0147688	0.000698322	0.312343	0.274416	0.624258
TXLNB	0.0067859	0.0920463	0.0163666	0.517672	0.408262	0.624258
ZMYM4	0.00679882	0.000120449	1.74857e-07	0.0829701	0.184749	0.624258
C8orf37	0.0068049	0.00962084	0.000333104	0.277873	0.288768	0.624258
SLC44A3	0.00681201	0.0700509	0.010212	0.480525	0.062331	0.624258
IRAK1	0.00681905	1.21771e+06	47.5379	3.11922e+10	0.5085	0.624258
RAB27A	0.00682611	0.0013933	1.18813e-05	0.16339	0.211686	0.624258
COTL1	0.00689654	7.51707e-06	1.44206e-09	0.0391843	0.701011	0.624258
SDC1	0.00694168	43.2049	2.80618	665.197	0.687046	0.624258
MS4A4A	0.00695191	15.9665	2.13553	119.374	0.208016	0.624258
CRLF3	0.00696127	0.000466285	1.77505e-06	0.122488	0.364036	0.624258
GIMAP2	0.00700023	0.00260444	3.44782e-05	0.196735	0.608423	0.624258
LATS2	0.00703751	38.5698	2.70808	549.329	0.130594	0.624258
UBL4A	0.00708608	159.447	3.97573	6394.61	0.462756	0.624258
PHYH	0.00709206	18.3796	2.2079	153	0.216295	0.624258
CXorf65	0.00719973	0.0790497	0.0124205	0.503107	0.694462	0.624258
ACADSB	0.00725345	0.00166955	1.56736e-05	0.17784	0.13452	0.624258
INO80	0.00725781	0.00088789	5.25502e-06	0.150018	0.726106	0.624258
HYAL3	0.00727344	15.4338	2.09229	113.847	0.62642	0.624258
CASKIN1	0.00731446	0.00945178	0.000313435	0.285022	0.4883	0.624258
PRB4	0.00732011	8.52274	1.78035	40.7993	0.925594	0.624258
NUCKS1	0.00733906	1.31386e-07	1.22438e-12	0.0140987	0.0175072	0.624258
AMN1	0.00734345	0.0116535	0.000449622	0.30204	0.146656	0.624258
CLIP2	0.00741453	0.0999762	0.0185286	0.539448	0.567589	0.624258
ARHGAP30	0.00741706	0.002965	4.18336e-05	0.210148	0.81412	0.624258
MNAT1	0.00741721	0.0345497	0.0029415	0.405806	0.397865	0.624258
MPP3	0.00742465	48.2146	2.82436	823.071	0.373312	0.624258
PELO	0.00750736	570.132	5.43897	59763.3	0.334793	0.627666
PFKFB2	0.00762116	47.8205	2.79207	819.033	0.107453	0.633621
KLHDC2	0.00774868	0.000268205	6.30457e-07	0.114098	0.0909412	0.640644
CASP9	0.00792769	0.0264392	0.00180962	0.386288	0.974666	0.643478
ACTR1B	0.00793869	4.48958e-06	5.05687e-10	0.0398593	0.526843	0.643478
FTL	0.00798607	1291156010813710080	53623.8	3.10885e+31	0.150247	0.643478
MAP3K2	0.00798789	0.00041331	1.30641e-06	0.13076	0.203907	0.643478
MAP7D2	0.00803923	22.3989	2.24773	223.207	0.513186	0.643478
LOC100133985	0.00804405	0.00827815	0.00023886	0.286895	0.15561	0.643478
CYP4A11	0.00808564	40.417	2.61607	624.423	0.0256868	0.643478
VIM	0.00814434	7.32951e-10	1.25504e-16	0.00428049	0.634819	0.644703
BDKRB1	0.00823976	28.705	2.37908	346.343	0.587557	0.648804
CACNG2	0.00835528	0.0162676	0.000762196	0.347202	0.919961	0.654438
NAGLU	0.00847861	212.604	3.93154	11496.9	0.161724	0.654835
RCAN3	0.00851303	0.00083544	4.25508e-06	0.16403	0.966146	0.654835
ZNF319	0.0085596	0.00194752	1.85724e-05	0.204219	0.63598	0.654835
ZNF792	0.00858585	0.0243261	0.00152215	0.388764	0.40916	0.654835
CCDC22	0.0085999	13.5326	1.93845	94.4722	0.991504	0.654835
HMGCS2	0.00867119	145.752	3.53178	6015.04	0.948818	0.654835
ACSM2B	0.00868326	23.586	2.22575	249.938	0.814823	0.654835
ZNF667	0.00871236	39.3342	2.53038	611.442	0.360905	0.654835
MRPS7	0.00879423	4105.75	8.13287	2.07273e+06	0.477776	0.656418
CACNG8	0.00882164	69.7913	2.91011	1673.76	0.465231	0.656418
ITK	0.00893974	0.00619136	0.000136867	0.280073	0.285567	0.659101
KHDRBS2	0.00894627	32.2169	2.38437	435.304	0.265983	0.659101
CSN1S1	0.00910089	22.6386	2.17144	236.021	0.629241	0.65923
ABAT	0.00914445	0.0193814	0.000999151	0.375956	0.172976	0.65923
ZNF706	0.0091471	1764.84	6.38769	487605	0.166266	0.65923
FAM91A1	0.00917748	0.0213346	0.00118057	0.385547	0.592168	0.65923
JPH1	0.00918596	7.38751	1.64084	33.2606	0.641753	0.65923
DOCK2	0.00925018	9.73106e-06	1.63661e-09	0.0578596	0.157042	0.65923
RBX1	0.0092581	5.79207e-07	1.16237e-11	0.0288618	0.53683	0.65923
GLTPD2	0.0093477	114.28	3.20664	4072.8	0.617604	0.66244
SLC35A1	0.0095026	0.00209467	1.97953e-05	0.22165	0.577733	0.666137
AKIRIN2	0.00954977	0.0123455	0.000444868	0.342601	0.521698	0.666137
VDR	0.0095583	27.1061	2.23457	328.807	0.666607	0.666137
USP12	0.00965899	0.0101486	0.000313681	0.32834	0.868284	0.666137
LYSMD2	0.00968795	0.0264777	0.00169012	0.414804	0.511083	0.666137
EBF1	0.00976611	0.0283446	0.00189964	0.422932	0.103538	0.666137
CHRM4	0.00983189	17.3638	1.98853	151.62	0.322285	0.666137
RHOV	0.00995537	11.8547	1.80822	77.719	0.359091	0.666137
FCGR1B	0.00999088	11.672	1.7999	75.6907	0.279632	0.666137
MAPK8	0.0100207	0.00105308	5.70436e-06	0.19441	0.31449	0.666137
LRP3	0.0100845	0.00880768	0.000239511	0.323891	0.538461	0.666137
TSPYL4	0.0101746	0.00147181	1.0182e-05	0.212752	0.0339396	0.666137
CDC42EP3	0.0101811	0.0027834	3.12923e-05	0.247579	0.909261	0.666137
NIF3L1	0.0102375	0.000142518	1.6522e-07	0.122935	0.582867	0.666137
FAM126B	0.0102903	0.00762078	0.000183728	0.316099	0.8137	0.666137
APTX	0.0103022	323.781	3.913	26791.3	0.643887	0.666137
PTGDS	0.0103308	0.00448833	7.20592e-05	0.279563	0.948254	0.666137
CCDC86	0.0103549	1010.65	5.10043	200259	0.0221735	0.666137
PLD4	0.0103801	0.151251	0.0356764	0.641237	0.786198	0.666137
SDSL	0.0104012	22.6853	2.08287	247.074	0.264162	0.666137
HK3	0.0104818	4.95529	1.45484	16.8781	0.196017	0.666137
TLR10	0.0105105	0.0131689	0.000477582	0.36312	0.250007	0.666137
GNPTG	0.0105515	0.00403789	5.90748e-05	0.275999	0.944967	0.666137
EMX2OS	0.0105704	95.1081	2.89502	3124.52	0.000133715	0.666137
CD3D	0.0106096	0.000460921	1.27223e-06	0.166989	0.666193	0.666137
PDHB	0.0106214	0.000895983	4.11437e-06	0.195118	0.851512	0.666137
CCL26	0.0106571	0.187528	0.0518986	0.677607	0.319813	0.666137
XRN1	0.0106946	4.03365e-06	2.90847e-10	0.0559411	0.563322	0.666137
NUMA1	0.0107026	0.0186721	0.000878191	0.397008	0.00345152	0.666137
TDRD12	0.0107543	0.00828841	0.000208423	0.329607	0.881185	0.666137
TLX3	0.0108177	40.0892	2.34536	685.243	0.900867	0.666137
PLCD1	0.0108322	156.671	3.21077	7644.8	0.559103	0.666137
SVIL	0.0109026	0.0112808	0.00035717	0.356291	0.736108	0.667707
ACSS3	0.0110477	634.846	4.37552	92110.2	0.483457	0.673818
CAD	0.0110988	370.556	3.85736	35597.3	0.556369	0.674175
PANK4	0.0111896	0.053893	0.00564245	0.51475	0.879938	0.675181
SLC39A2	0.0112248	14.2458	1.82776	111.034	0.857965	0.675181
MITF	0.0112515	37.1446	2.26993	607.826	0.082518	0.675181
ANKRD16	0.0114776	581.005	4.17777	80800.7	0.599216	0.685733
PPP2CA	0.0115366	0.00166184	1.1588e-05	0.238325	0.724323	0.685733
GAL3ST1	0.011677	145.621	3.03334	6990.83	0.639627	0.685733
TMEM67	0.0116864	0.0117325	0.000370432	0.371595	0.193676	0.685733
ACAP2	0.0117156	0.000669517	2.27792e-06	0.196782	0.00429592	0.685733
LRBA	0.0117375	0.00586252	0.000107681	0.319174	0.286537	0.685733
CASC2	0.0117499	0.0915715	0.0142599	0.588036	0.882355	0.685733
JAM3	0.0118184	0.00269506	2.69272e-05	0.269741	0.292195	0.687037
GATS	0.0119161	51.188	2.38229	1099.87	0.186747	0.690021
CXCL13	0.0119973	0.0279692	0.00171721	0.45555	0.9152	0.692033
KLHL31	0.0121859	123.67	2.85991	5347.77	0.154757	0.693002
PKD2	0.0122004	0.0196336	0.000908023	0.424524	0.880177	0.693002
FKRP	0.0122082	0.00235433	2.07222e-05	0.267483	0.138796	0.693002
GNAT1	0.0122398	407.889	3.69934	44973.8	0.102591	0.693002
CLIC3	0.012247	0.10246	0.0172336	0.609163	0.419717	0.693002
SFPQ	0.0123477	5.79341e-05	2.77879e-08	0.120785	0.00619626	0.696055
PLEKHM3	0.0124335	0.0934909	0.0145793	0.599517	0.921448	0.698244
COL1A2	0.0125263	0.0172799	0.00071469	0.417797	0.964565	0.700811
ATXN8OS	0.0126094	19.7867	1.89601	206.493	0.864249	0.701236
LHX2	0.0126651	5.36661	1.43229	20.108	0.726558	0.701236
AKAP1	0.0127366	144.789	2.88844	7257.83	0.990961	0.701236
CAMK2A	0.0127684	37.2031	2.15976	640.847	0.855178	0.701236
APPL1	0.0127695	0.00733808	0.000153321	0.351208	0.377327	0.701236
RABEP2	0.0129124	0.0115142	0.000341053	0.388731	0.141649	0.70249
CPA3	0.0130198	7.6157	1.53389	37.8117	0.756155	0.70249
METTL13	0.013085	304.977	3.32717	27955	0.919055	0.70249
CRYBA1	0.0131797	43.5928	2.20387	862.273	0.220785	0.70249
SIGLEC7	0.0132295	153.701	2.8629	8251.77	0.000955508	0.70249
DCP1A	0.013336	0.00193192	1.36919e-05	0.272593	0.788612	0.70249
ASAP2	0.01337	0.0210675	0.000989481	0.448558	0.629798	0.70249
POLR1B	0.013397	219.945	3.06163	15800.7	0.110573	0.70249
HSPB8	0.0134087	0.0043003	5.72443e-05	0.323047	0.717882	0.70249
LRP5	0.0134354	38.5207	2.13039	696.513	0.696581	0.70249
ZNF677	0.0135676	0.0329483	0.00219287	0.495054	0.832994	0.70249
TYK2	0.0135848	3.46883e-07	2.57181e-12	0.0467873	0.631406	0.70249
TSPAN12	0.0136161	0.0162639	0.000616918	0.428768	0.959437	0.70249
HIST1H1C	0.0136313	10.3436	1.61618	66.1999	0.669887	0.70249
SNX27	0.0136613	1228.32	4.30516	350455	0.0118997	0.70249
RPS21	0.0137139	11.5524	1.65048	80.8605	0.819561	0.70249
MAS1	0.0137226	0.122857	0.0231847	0.651024	0.346648	0.70249
LSP1	0.0137353	0.0137879	0.00045672	0.416243	0.947508	0.70249
UCKL1	0.0137619	0.0463526	0.00402499	0.533804	0.0436496	0.70249
CCDC43	0.0138147	345.883	3.29427	36316.1	0.553557	0.70249
PCDH11X	0.0138332	52.0448	2.23745	1210.6	0.87276	0.70249
DNASE1L3	0.0139052	0.102716	0.0167525	0.629787	0.715393	0.70249
GPR158	0.0139932	416.192	3.39031	51091.5	0.110592	0.70249
RALBP1	0.0140112	707.269	3.77078	132660	0.492546	0.70249
ZNF45	0.0140274	0.0519461	0.00490635	0.54998	0.25123	0.70249
DDO	0.0140343	36.0859	2.06409	630.881	0.538358	0.70249
SMG5	0.0140668	450.983	3.43299	59244.3	0.864541	0.70249
NAE1	0.0141363	0.00208021	1.49948e-05	0.288586	0.269123	0.702516
ALDH1B1	0.0141856	161.54	2.77657	9398.31	0.311337	0.702516
SYT3	0.0142089	16.5785	1.7567	156.457	0.567282	0.702516
MYF5	0.0143962	84.0713	2.41663	2924.72	0.373891	0.70774
SRGN	0.0147412	0.000357693	6.07527e-07	0.210599	0.890239	0.70774
KCTD5	0.0147474	0.00944305	0.000222643	0.400512	0.548373	0.70774
GNL3	0.0147677	31.7831	1.97042	512.664	0.465892	0.70774
DHRS7C	0.0147821	27.321	1.9121	390.377	0.0895129	0.70774
C2orf80	0.0148133	13.212	1.65727	105.328	0.127489	0.70774
SLITRK1	0.0148777	11.7702	1.61814	85.6148	0.829172	0.70774
UBAP1	0.014902	0.00593579	9.575e-05	0.367975	0.478801	0.70774
CNGA3	0.0150392	172.675	2.71526	10981.2	0.754834	0.70774
HS3ST3B1	0.0150751	0.0459753	0.00383717	0.550856	0.623622	0.70774
UBLCP1	0.0150792	0.000835236	2.75115e-06	0.253573	0.890878	0.70774
FAM26F	0.0150938	61.9409	2.22174	1726.88	0.438468	0.70774
ETFDH	0.0152107	0.00124996	5.6593e-06	0.276079	0.326286	0.70774
TSTD1	0.0152554	49920.9	7.99738	3.11614e+08	0.368787	0.70774
BTD	0.0153153	0.00430338	5.26317e-05	0.351862	0.411517	0.70774
HDLBP	0.0153311	456.392	3.2322	64443.4	0.826439	0.70774
KCNK13	0.0153366	0.0259078	0.00135132	0.496708	0.998059	0.70774
HOXB1	0.0153391	202.561	2.76543	14837.1	0.00525021	0.70774
HCK	0.0153541	35.5999	1.98133	639.648	0.00206684	0.70774
COL4A1	0.0154722	0.084857	0.0115196	0.625086	0.560434	0.70774
ALAD	0.0155051	0.0178948	0.000688366	0.465197	0.208616	0.70774
FAM13B	0.0155734	0.000490774	1.02199e-06	0.235676	0.021821	0.70774
SEC24B	0.0156274	0.00168222	9.47975e-06	0.298516	0.0429198	0.70774
C19orf10	0.0156275	31.5289	1.92153	517.334	0.14618	0.70774
FN1	0.0156443	0.00599407	9.45673e-05	0.379929	0.242072	0.70774
RASL11B	0.015741	7.0963	1.44648	34.8137	0.779576	0.70774
NCKIPSD	0.0157419	706.856	3.44131	145191	0.176342	0.70774
AAK1	0.0157732	0.000823961	2.58231e-06	0.262908	0.365553	0.70774
CKLF	0.0158995	262.829	2.83683	24350.7	0.935763	0.70774
PTRH2	0.0159929	276.365	2.85203	26780.2	0.229282	0.70774
CRP	0.0160512	50.1469	2.07112	1214.18	0.81607	0.70774
C1QB	0.0162208	14.7907	1.64463	133.017	0.110089	0.70774
BMPR1B	0.0162483	0.00828186	0.00016607	0.413013	0.201609	0.70774
GPR39	0.0163661	0.00555547	8.00644e-05	0.38548	0.114198	0.70774
TM4SF20	0.0164997	75.4628	2.20186	2586.28	0.289004	0.70774
PRDM16	0.0165008	0.0284955	0.00155463	0.522306	0.251771	0.70774
C3	0.0165009	0.000806986	2.38985e-06	0.272497	0.00908665	0.70774
TLE3	0.0165625	0.0162627	0.000559879	0.472383	0.293972	0.70774
CASP8AP2	0.0165903	0.0672188	0.00738287	0.612006	0.307125	0.70774
SOX18	0.01669	0.0119408	0.000317945	0.44845	0.845004	0.70774
CAB39	0.0166914	0.00959126	0.000213428	0.431023	0.117996	0.70774
ZFAT	0.0167112	0.0113051	0.000287625	0.444345	0.786749	0.70774
SIRPB1	0.0167193	0.0755833	0.00911473	0.62677	0.834968	0.70774
PUS3	0.0167307	140.561	2.44547	8079.19	0.981476	0.70774
HFE	0.0167705	369.01	2.90661	46847.7	0.737267	0.70774
CDKN1B	0.0167992	0.00023836	2.55653e-07	0.222237	0.0089623	0.70774
CRYGA	0.0168333	0.012933	0.00036591	0.457112	0.0865903	0.70774
UROS	0.0168531	120.838	2.36909	6163.52	0.303279	0.70774
GNAQ	0.0169323	0.027871	0.00147604	0.52627	0.133856	0.70774
SEC23IP	0.0169521	0.0129166	0.000363662	0.458774	0.222615	0.70774
GIT2	0.0169962	0.0111661	0.000278542	0.44762	0.535907	0.70774
IKZF1	0.0170069	0.000269785	3.16217e-07	0.23017	0.120502	0.70774
TBL2	0.017016	25.4258	1.78277	362.621	0.229755	0.70774
MAP3K13	0.0170302	44.4953	1.96947	1005.26	0.574291	0.70774
ADAP2	0.0170706	14.9042	1.61872	137.229	0.260659	0.70774
ATP5G1	0.017094	3449.12	4.2665	2.78834e+06	0.0350799	0.70774
FAM155A	0.0171501	0.109395	0.0177317	0.674906	0.581104	0.70774
HSF2	0.0171713	0.0178987	0.000654365	0.489581	0.196121	0.70774
DR1	0.0171766	0.000696397	1.76228e-06	0.275194	0.311974	0.70774
LMCD1	0.0172114	0.00565264	7.99609e-05	0.3996	0.610431	0.70774
WDR48	0.0172282	0.00908803	0.000189895	0.434938	0.412956	0.70774
ATG2B	0.0173365	0.00193603	1.12764e-05	0.332396	0.797934	0.70774
COMTD1	0.017375	40.5184	1.91862	855.688	0.480622	0.70774
CEP72	0.0173858	0.0570943	0.00539461	0.604262	0.710107	0.70774
LTF	0.0174384	0.33387	0.135144	0.824819	0.00888592	0.70774
SYT1	0.0175219	8.83294	1.46393	53.2953	0.622008	0.70774
SIPA1	0.0175407	0.00883201	0.000178309	0.437468	0.521107	0.70774
TMEM14A	0.0175484	0.016641	0.000566526	0.488811	0.0102136	0.70774
CASP10	0.0176335	52.5901	1.99375	1387.2	0.936495	0.708398
PSMD6	0.01766	6.95221e-08	8.4977e-14	0.056878	0.553676	0.708398
P2RY6	0.0177283	28.7917	1.79103	462.841	0.134113	0.709229
GLUL	0.0179175	65.8869	2.05574	2111.69	0.0115129	0.714874
KRT25	0.0179821	36.103	1.85049	704.368	0.206696	0.715532
TTLL12	0.0180582	60.284	2.01614	1802.53	0.361087	0.716598
NAPSA	0.0182461	50.0393	1.94265	1288.93	0.180599	0.716598
ARL6IP1	0.0183073	2.15738e-06	4.23627e-11	0.109868	0.565949	0.716598
PAFAH1B1	0.0184257	0.0137189	0.000387594	0.485584	0.974047	0.716598
COL21A1	0.0184566	30.2586	1.77459	515.94	0.947595	0.716598
TFAP2A	0.0185196	78.2567	2.07811	2946.97	0.617875	0.716598
ARF6	0.0185636	0.00224998	1.40522e-05	0.360257	0.788457	0.716598
PHF3	0.0185995	0.00154156	7.01606e-06	0.338709	0.0526029	0.716598
GLA	0.0186175	32.7371	1.79111	598.355	0.0359779	0.716598
RGS6	0.0186599	47.0413	1.90075	1164.22	0.660574	0.716598
VTA1	0.0186638	0.0171204	0.000577536	0.507512	0.182203	0.716598
POLR1C	0.0187319	512.3	2.82162	93014.2	0.0118298	0.716598
SHMT1	0.0187343	73.9567	2.0451	2674.49	0.60813	0.716598
IMPDH1	0.0187818	155.037	2.309	10409.9	0.0304394	0.716598
MTSS1	0.0188205	131.933	2.24501	7753.35	0.767267	0.716598
SNX3	0.018907	0.00101931	3.23849e-06	0.320824	0.0580092	0.716598
TRAPPC6B	0.0189305	0.000283699	3.09408e-07	0.260125	0.335649	0.716598
UBP1	0.0190886	2.10966e-07	5.51674e-13	0.0806752	0.294838	0.716598
MYLPF	0.019091	34.2758	1.78382	658.602	0.0882676	0.716598
SLC45A3	0.0191023	0.03371	0.00197914	0.574168	0.0485613	0.716598
CASP2	0.0191201	0.000232708	2.12723e-07	0.254571	0.600539	0.716598
SLC31A1	0.0191506	35.3468	1.79018	697.916	0.798941	0.716598
ALG14	0.0191902	17.4304	1.59369	190.637	0.791947	0.716598
GATA2	0.0191957	37.4568	1.80516	777.222	0.390088	0.716598
EPHX1	0.0192621	22.669	1.66088	309.405	0.0585739	0.716598
XAGE2	0.0193339	14.1169	1.53578	129.763	0.86747	0.716598
ALDH2	0.0194852	0.00933784	0.000185061	0.47117	0.144782	0.716598
EXOG	0.0195031	0.00527369	6.46733e-05	0.430036	0.194097	0.716598
PJA2	0.0195545	0.0202983	0.000770265	0.534911	0.0826686	0.716598
TAF12	0.0195629	0.182109	0.0435878	0.760847	0.597324	0.716598
KLHDC4	0.019585	599.087	2.78813	128726	0.1682	0.716598
DNAL1	0.0195879	0.0125807	0.000319187	0.495868	0.44856	0.716598
ADAM33	0.019606	14.497	1.53468	136.942	0.00100734	0.716598
SLC18A1	0.019646	0.065498	0.00663366	0.6467	0.613991	0.716598
CTSB	0.0197213	439.422	2.63791	73198.9	0.545121	0.717041
CASP8	0.0197669	0.0230366	0.000966819	0.548896	0.0317149	0.717041
SRP9	0.0198027	0.000346312	4.25204e-07	0.282058	0.146775	0.717041
SGPP2	0.0199441	0.0794197	0.00940867	0.670391	0.953336	0.719236
SF3A1	0.01996	0.0151951	0.000446963	0.516578	0.83528	0.719236
FGF19	0.0200543	11.9841	1.47732	97.2163	0.766484	0.720891
MASP1	0.0203864	222.292	2.30938	21397	0.98552	0.724233
GPN2	0.0204016	0.00368972	3.24016e-05	0.420166	0.330086	0.724233
FSHR	0.0205757	253.539	2.3404	27466.2	0.729401	0.724233
SPRR2G	0.0205947	0.121437	0.0203817	0.723538	0.593118	0.724233
RFX7	0.0206236	0.000742898	1.66541e-06	0.331389	0.0531801	0.724233
SCGB1A1	0.0206533	12.2138	1.46687	101.698	0.0924668	0.724233
UBE4B	0.0207888	0.0106001	0.000224466	0.500576	0.944769	0.724233
AMN	0.0208164	17.4077	1.54384	196.283	0.877589	0.724233
NR0B1	0.0208214	59.2058	1.85932	1885.28	0.736898	0.724233
TMEM39B	0.0210381	0.0169786	0.000532439	0.541419	0.0925832	0.724233
SLC6A3	0.0211479	18.0021	1.54193	210.175	0.536471	0.724233
CPM	0.0211595	180.637	2.17734	14986	0.885674	0.724233
UBE2D4	0.0211649	39211.8	4.87126	3.1564e+08	0.94494	0.724233
F8	0.0211739	37.1805	1.71785	804.721	0.0230367	0.724233
L3MBTL2	0.0213	8.31104e-06	3.9385e-10	0.17538	0.966581	0.724233
PICALM	0.0213104	0.0120729	0.000281154	0.518418	0.30898	0.724233
NNAT	0.0213569	9.22981	1.39083	61.2509	0.906268	0.724233
DHX32	0.02137	160.898	2.12496	12182.8	0.308922	0.724233
CDH3	0.0214128	0.112211	0.0174074	0.723329	0.860651	0.724233
SULT1E1	0.0214563	43.2007	1.74465	1069.73	0.849177	0.724233
RSAD1	0.0214696	46.9681	1.76575	1249.33	0.733429	0.724233
TCN2	0.0215346	14.7479	1.48637	146.331	0.139189	0.724233
MAP7	0.0216328	0.0367726	0.00219481	0.616102	0.394897	0.724233
CYBRD1	0.0217635	0.00125967	4.20011e-06	0.377791	0.63715	0.724233
HMBS	0.0218102	46.2646	1.74691	1225.26	0.519613	0.724233
NOG	0.0218181	0.229415	0.0651975	0.807258	0.560908	0.724233
SLC35A2	0.0218358	100.957	1.95542	5212.3	0.164301	0.724233
LAIR2	0.0218534	25.0183	1.59601	392.176	0.146903	0.724233
ZNF789	0.0219459	0.021664	0.000816844	0.574561	0.200896	0.724233
SPR	0.0219737	13.7235	1.45976	129.017	0.0312174	0.724233
AGGF1	0.022066	0.000837435	1.94304e-06	0.360927	0.910751	0.724233
WDR12	0.0221424	108.029	1.95654	5964.71	0.26107	0.724233
PRLR	0.0221474	238.839	2.19182	26025.8	0.271839	0.724233
RAB8B	0.0222366	0.00739146	0.00011007	0.496353	0.563039	0.724233
RBMX2	0.0223771	288.65	2.23342	37305.4	0.283938	0.724233
DPF1	0.022412	35.6222	1.65861	765.064	0.213566	0.724233
ANP32D	0.0224602	41.4365	1.69257	1014.43	0.38232	0.724233
PYGL	0.022509	82.2315	1.86213	3631.33	0.186316	0.724233
GEMIN8	0.0227005	22.8558	1.54866	337.317	0.0184595	0.724233
WFDC10A	0.0227038	12.96	1.43052	117.413	0.940772	0.724233
JOSD1	0.0227195	0.00153793	5.84435e-06	0.404703	0.086911	0.724233
SLC38A5	0.0228134	68.9821	1.80177	2641.04	0.00858604	0.724233
ACSBG1	0.0228493	0.0299243	0.00145757	0.614354	0.173738	0.724233
AFF1	0.0228868	97.887	1.88761	5076.2	0.678667	0.724233
NENF	0.0229129	1089.57	2.63304	450873	0.295547	0.724233
TLCD1	0.0229881	11.6812	1.40369	97.2088	0.291626	0.724233
LCP1	0.0230401	3.9367e-11	4.19087e-20	0.0369795	0.222746	0.724233
BCORL1	0.0230805	0.00374616	3.02347e-05	0.464158	0.843211	0.724233
PNMAL2	0.0230841	15.5361	1.4576	165.596	0.92788	0.724233
FAM131C	0.0230969	11.1631	1.39263	89.4814	0.764791	0.724233
KIF19	0.023111	0.114453	0.017636	0.742774	0.18557	0.724233
PLAC8	0.0231132	0.126236	0.0211671	0.752848	0.918078	0.724233
ATG4A	0.0231362	46.6118	1.6929	1283.4	0.798156	0.724233
HDDC3	0.0232081	603.459	2.39757	151888	0.679961	0.724233
GPATCH4	0.0232533	209.6	2.072	21202.8	0.697567	0.724233
DHX35	0.0232583	0.085994	0.0103306	0.715828	0.694839	0.724233
S100B	0.0232871	0.0880871	0.0107995	0.718492	0.819742	0.724233
PNPO	0.0233408	676.137	2.42195	188757	0.0810279	0.724233
ME1	0.0233616	34.0002	1.61322	716.586	0.60592	0.724233
WRN	0.0234074	0.0200029	0.000679362	0.588962	0.829976	0.724233
ZC3H7A	0.0234698	0.0104456	0.000201928	0.540348	0.0243645	0.724233
SAGE1	0.0234699	219.803	2.0703	23336.4	0.242644	0.724233
PHC1	0.0234882	0.033908	0.00181451	0.633645	0.652643	0.724233
HIST1H2AC	0.023489	13.1219	1.41491	121.692	0.548894	0.724233
HRH4	0.0235538	100.211	1.85763	5405.96	0.295228	0.724233
CAPZB	0.0235717	1.14028e-05	5.99653e-10	0.216833	0.732723	0.724233
SLN	0.0236012	8.81048	1.33889	57.9766	0.737646	0.724233
EIF2A	0.0237867	3.93823e-09	2.03329e-16	0.0762787	0.762798	0.724233
TOP3A	0.023797	435.71	2.24271	84648.8	0.22203	0.724233
ZNF33B	0.0238716	64.0722	1.73496	2366.19	0.962644	0.724233
FAM20A	0.0238734	10.0378	1.35723	74.2374	0.0290095	0.724233
FCER1A	0.0238752	0.0550818	0.00445389	0.681203	0.197339	0.724233
PAX9	0.0238959	0.0382542	0.00225355	0.649368	0.88698	0.724233
DENND4C	0.0239374	0.00147005	5.11324e-06	0.422638	0.345532	0.724233
ADD2	0.0239671	61.1378	1.72005	2173.09	0.0291482	0.724233
NUBPL	0.0239708	0.0173455	0.000513467	0.585952	0.393366	0.724233
PRB1	0.0240267	8.55732	1.32616	55.2179	0.657899	0.724233
CPNE2	0.0241026	85.1561	1.79022	4050.64	0.511802	0.724233
RAD52	0.0241036	0.0129731	0.000297382	0.565944	0.567326	0.724233
PDLIM7	0.0242006	0.00939018	0.000162091	0.543987	0.118574	0.724233
PARD6G	0.0242957	22.5009	1.49821	337.932	0.057475	0.724233
GXYLT2	0.0243509	0.123051	0.0198612	0.762365	0.493084	0.724233
PRDX5	0.024422	3.06181e-07	6.49704e-13	0.144292	0.613991	0.724233
RASSF5	0.024432	1.90089e-09	4.81948e-17	0.0749744	0.0555079	0.724233
CDC40	0.0244545	0.00327982	2.2482e-05	0.478482	0.0334416	0.724233
PNLIPRP1	0.0246517	64.6114	1.70264	2451.85	0.454338	0.724233
PNPLA5	0.0246562	0.0186329	0.000577229	0.601467	0.969501	0.724233
ACTN1	0.0246588	0.00245036	1.2932e-05	0.464294	0.973633	0.724233
LY75	0.024722	0.00036127	3.57817e-07	0.364757	0.319025	0.724233
MAP4K2	0.0247291	0.111363	0.0163959	0.756387	0.745262	0.724233
H6PD	0.024785	0.0100289	0.000180332	0.557742	0.956598	0.724233
NLRP2	0.0248722	5.6074	1.24335	25.2888	0.802074	0.724233
PAEP	0.0249093	1375.39	2.48765	760430	0.106298	0.724233
EED	0.0249651	0.00599085	6.83143e-05	0.52537	0.141793	0.724233
SOCS1	0.0249737	0.0100724	0.000180849	0.560982	0.202892	0.724233
FRS2	0.0250927	206.03	1.9465	21807.5	0.668523	0.724233
ZNF442	0.0251383	0.0506296	0.00371886	0.689286	0.674563	0.724233
SORL1	0.0251849	0.0172047	0.000490759	0.603149	0.919868	0.724233
NEK4	0.0252426	0.0288797	0.00129489	0.644098	0.453775	0.724233
SYPL1	0.0252613	0.00108176	2.72904e-06	0.428799	0.0311257	0.724233
HLA-DRA	0.0252704	2.89503e-06	4.07116e-11	0.205867	0.798349	0.724233
LRP4	0.025359	6.43125	1.2582	32.8731	0.538353	0.724233
SERINC1	0.025392	0.0294434	0.00133848	0.647684	0.207441	0.724233
GNB1	0.0253939	9.70504e-06	3.90473e-10	0.241214	0.766252	0.724233
TLR8	0.025405	25.8382	1.49243	447.332	0.195197	0.724233
ARHGAP5	0.0254108	0.0169917	0.00047679	0.605545	0.724804	0.724233
SCN1A	0.0254279	35.2534	1.54988	801.868	0.414619	0.724233
BEST2	0.0255295	0.0535772	0.00410694	0.698942	0.633912	0.724233
CASC4	0.0255771	0.000715989	1.24121e-06	0.413016	0.314714	0.724233
AIG1	0.0255978	0.0633039	0.00561131	0.714161	0.928324	0.724233
ANKS1A	0.025639	0.0109372	0.000207276	0.577115	0.351825	0.724233
C15orf43	0.0256679	0.0539234	0.00414692	0.701178	0.337918	0.724233
SGPP1	0.0257086	0.0659787	0.00605397	0.719063	0.266921	0.724233
RHOBTB3	0.0257449	28.0077	1.49719	523.936	0.518984	0.724233
LEF1	0.0257951	0.02057	0.000676467	0.625493	0.508365	0.724233
CASZ1	0.0258825	0.0220681	0.000770477	0.632075	0.625127	0.724233
CEBPA	0.0258925	0.0308672	0.00144746	0.658246	0.801885	0.724233
YLPM1	0.0259345	0.0156892	0.000405227	0.607436	0.0763723	0.724233
ZNF551	0.0260163	0.00607264	6.78645e-05	0.543391	0.431597	0.724233
CXCL1	0.0260432	7.84425	1.27867	48.1222	0.113573	0.724233
TMEM151A	0.0260686	35.8046	1.53185	836.874	0.554731	0.724233
FBXO3	0.0260845	0.00295232	1.74432e-05	0.49969	0.0619113	0.724233
RAB11FIP5	0.0261607	281.658	1.95279	40624.4	0.569371	0.724998
VPREB1	0.0263354	4.30245	1.18724	15.5916	0.55151	0.72592
CDC14B	0.0263366	306.003	1.96046	47763.2	0.942961	0.72592
B4GALT3	0.0263403	86.5082	1.6896	4429.25	0.186317	0.72592
PGAM2	0.0265036	36.5724	1.52167	878.992	0.774698	0.728251
LRFN1	0.0265361	45.4486	1.5596	1324.43	0.031692	0.728251
MCM9	0.0265779	0.0102813	0.00017993	0.587483	0.202106	0.728251
AHSP	0.0266387	6.74868	1.24756	36.5069	0.101017	0.728251
FANCD2	0.026785	0.00214596	9.33456e-06	0.493343	0.577753	0.728251
YY1	0.0268045	7.31777e-05	1.59906e-08	0.334881	0.000572227	0.728251
ZNF154	0.0268089	0.0728321	0.00716662	0.740169	0.268729	0.728251
CMTM7	0.0268528	0.000215283	1.21972e-07	0.379978	0.873766	0.728251
NDN	0.026873	98.0532	1.6904	5687.66	0.32797	0.728251
GRAMD4	0.027042	0.0193981	0.000588659	0.639225	0.0286702	0.728251
METTL1	0.0271054	93.9081	1.67181	5274.97	0.114173	0.728251
ERMP1	0.0271118	0.0141844	0.000325577	0.617973	0.459915	0.728251
SRPRB	0.0271991	760.226	2.11049	273844	0.00236076	0.728251
OAS1	0.0272189	9.10261	1.282	64.6314	0.34779	0.728251
RBM4B	0.0272498	0.0103324	0.000178408	0.598396	0.563797	0.728251
HOXB5	0.0273115	14.4258	1.34823	154.354	0.574709	0.728251
KLC1	0.0273543	0.00185902	6.97581e-06	0.495422	0.140906	0.728251
MAP2K6	0.0273831	19.2842	1.39106	267.335	0.259773	0.728251
LRRC15	0.0273885	0.161769	0.032063	0.816184	0.119815	0.728251
GABRA6	0.0274036	33.1768	1.47723	745.11	0.0350528	0.728251
CD27	0.0274552	0.000370898	3.3093e-07	0.415693	0.28593	0.728323
CDC42EP2	0.0275301	56.5743	1.56314	2047.57	0.253926	0.72901
GLRX2	0.0276009	46.7674	1.52817	1431.25	0.39644	0.729426
TMEM175	0.0276753	0.00712421	8.73716e-05	0.580903	0.119791	0.729426
VEZT	0.0277337	0.00244014	1.15074e-05	0.517435	0.808297	0.729426
CHAT	0.0277766	37.9695	1.48799	968.879	0.555071	0.729426
SLC1A5	0.0278244	29.9256	1.44844	618.282	0.269486	0.729426
CYFIP2	0.0279047	0.00110056	2.5372e-06	0.477385	0.910944	0.729426
SAMD12	0.0279999	8.52039	1.26037	57.5999	0.156378	0.729426
METTL7B	0.0280098	7.39343	1.24106	44.0452	0.834099	0.729426
C1orf64	0.0280128	7.21121	1.23768	42.0153	0.41171	0.729426
PROZ	0.028036	0.0485067	0.00326045	0.72165	0.424357	0.729426
CLCN3	0.0281905	0.00548682	5.25251e-05	0.57316	0.0754547	0.730041
SCOC	0.0282039	0.0145271	0.000331686	0.636254	0.918853	0.730041
SPTY2D1	0.0282068	0.0348979	0.00174291	0.698752	0.807065	0.730041
LRRC37A2	0.0283837	0.0463496	0.00297349	0.722479	0.939213	0.73233
ALOX5AP	0.0283991	1.51221e-06	9.43408e-12	0.242395	0.0341902	0.73233
STK39	0.0284429	0.00425072	3.21453e-05	0.562092	0.113389	0.73233
EXOC5	0.0286251	0.0448758	0.00278517	0.723059	0.358974	0.733693
B3GALT6	0.0286341	0.00723924	8.76754e-05	0.597734	0.948351	0.733693
EGR2	0.0286437	0.0474338	0.00309277	0.727491	0.750062	0.733693
ACADVL	0.0287394	4320.26	2.38491	7.82613e+06	0.195225	0.734422
ATP2A1	0.0288195	40.8616	1.4675	1137.76	0.152023	0.734422
FTH1	0.0288202	562.087	1.92426	164189	0.114555	0.734422
CEACAM5	0.0288712	28.7908	1.41395	586.236	0.271254	0.734463
PTPRU	0.0289284	136.762	1.65773	11282.8	0.189729	0.734662
RPS6	0.0292883	1.75125e+07	5.36855	5.71266e+13	0.0810285	0.740201
NSDHL	0.0293125	144.198	1.64912	12608.6	0.775593	0.740201
LILRA3	0.0293221	11.7269	1.28095	107.358	0.587693	0.740201
RXFP3	0.0293681	237.085	1.7308	32475.9	0.12811	0.740201
RNF166	0.0293952	0.0996297	0.0125057	0.793725	0.378516	0.740201
C1orf116	0.0294678	104.845	1.59067	6910.63	0.451255	0.740291
UBE2J2	0.0294982	136.238	1.63144	11377	0.208234	0.740291
DFFB	0.0296203	0.0558017	0.00414265	0.751652	0.634362	0.742104
NFKBIB	0.02968	152.831	1.64189	14225.8	0.177042	0.742349
GFRA2	0.0300395	31.0281	1.39354	690.861	0.787318	0.745812
ANKRD33	0.0300942	11.0365	1.26019	96.6548	0.162185	0.745812
SULT4A1	0.0301884	15.5453	1.30062	185.802	0.969667	0.745812
CMBL	0.0301958	11.0176	1.2583	96.469	0.299202	0.745812
SLC7A9	0.0302121	0.0393836	0.00211354	0.733873	0.310744	0.745812
FBXL4	0.0302637	0.0652229	0.00551933	0.770752	0.37697	0.745812
GRM2	0.0303062	24.5543	1.35604	444.613	0.475388	0.745812
RORA	0.0303156	0.00574604	5.39286e-05	0.612236	0.343796	0.745812
DIO1	0.0303501	59.8483	1.47455	2429.09	0.413327	0.745812
TMEM14C	0.0303555	0.000291322	1.83742e-07	0.46189	0.6351	0.745812
ANAPC11	0.0304457	0.00393881	2.61637e-05	0.592968	0.169389	0.745812
CACNA1B	0.0304604	97.9808	1.54092	6230.2	0.159467	0.745812
ING1	0.0304712	0.013654	0.000279428	0.667191	0.691082	0.745812
LRIG1	0.0305956	45.8448	1.43037	1469.37	0.554579	0.745812
SLC5A6	0.0306019	932.528	1.89572	458723	0.123489	0.745812
ARID5A	0.0306966	0.0189978	0.000521826	0.691642	0.476828	0.745812
GPR3	0.0306984	7.51647	1.20637	46.8326	0.686107	0.745812
CD19	0.0307205	5.2196e-08	1.29345e-14	0.210632	0.885536	0.745812
RAB3IL1	0.0308549	124.222	1.55958	9894.45	0.0982678	0.747854
RBM8A	0.0310445	0.0110288	0.000183422	0.663133	0.0840236	0.751226
CLPS	0.0313984	15.9428	1.28028	198.529	0.838256	0.757061
HMOX1	0.0314623	13.1573	1.25742	137.674	0.00626964	0.757061
ABCB10	0.0314915	0.0179279	0.000459226	0.699898	0.285198	0.757061
MAP4K1	0.0315008	0.0102715	0.000158342	0.6663	0.665456	0.757061
AP1G1	0.03154	0.000702024	9.36934e-07	0.526011	0.61269	0.757061
NOL4	0.0316267	3.56406	1.11834	11.3583	0.739985	0.75792
SLC24A2	0.0317546	46.9	1.39936	1571.87	0.241263	0.759158
CEND1	0.0318161	13.9504	1.25768	154.74	0.112189	0.759158
MCRS1	0.0319277	0.00394749	2.51371e-05	0.619909	0.658543	0.759158
PYGO1	0.0319303	14.9881	1.26347	177.799	0.444745	0.759158
TBX10	0.0320591	7.83661	1.19296	51.4792	0.664195	0.759158
LTB4R2	0.0321963	8.66876	1.20143	62.5485	0.378848	0.759158
FCGR2A	0.032239	12.3891	1.23773	124.01	0.80503	0.759158
TUBGCP3	0.0323169	0.0306589	0.00126107	0.745369	0.30592	0.759158
LALBA	0.0323736	18.7605	1.27935	275.104	0.0429401	0.759158
TERF2	0.0324215	0.00621491	5.9119e-05	0.653347	0.370031	0.759158
LOH12CR1	0.032479	13.9553	1.2461	156.288	0.981049	0.759158
NIN	0.0326979	0.000716386	9.31465e-07	0.550969	0.262109	0.759158
HOXB2	0.0327429	0.0724706	0.00651451	0.8062	0.399775	0.759158
MFAP4	0.0327525	0.141648	0.023553	0.851872	0.026014	0.759158
ALDH1L1	0.0327946	31.6626	1.32665	755.68	0.925862	0.759158
ABI1	0.03281	0.014722	0.000305956	0.708394	0.0663861	0.759158
OASL	0.0328751	65.5704	1.40556	3058.89	0.109327	0.759158
CHCHD3	0.0329144	45.9161	1.36431	1545.31	0.219023	0.759158
HACE1	0.0329163	0.0974026	0.0114614	0.82776	0.329719	0.759158
TLR5	0.0329865	12.5745	1.22698	128.867	0.753036	0.759158
SEMA3D	0.0331757	32.261	1.31948	788.771	0.582904	0.759158
TUFT1	0.0332708	9.82434	1.19867	80.5205	0.898816	0.759158
FMOD	0.0333119	0.039332	0.00199821	0.774195	0.230794	0.759158
PPFIA4	0.0333132	0.0123032	0.000214337	0.706223	0.935462	0.759158
NOL11	0.0333417	2807.27	1.87158	4.21077e+06	0.364742	0.759158
FXN	0.0333822	17.4452	1.25244	242.993	0.918784	0.759158
RMST	0.0334702	0.00611078	5.56514e-05	0.670993	0.819856	0.759158
SLC9A5	0.0334729	38.2715	1.33005	1101.24	0.535529	0.759158
NLRP4	0.0334851	0.48586	0.249767	0.945121	0.00613746	0.759158
MED29	0.0335421	0.00221292	7.884e-06	0.621132	0.237957	0.759158
FATE1	0.0337085	14.7557	1.2304	176.96	0.512464	0.759158
LPP	0.0337356	0.000393682	2.83198e-07	0.547269	0.50527	0.759158
FAM166A	0.0338596	0.134028	0.0209383	0.857929	0.660493	0.759158
FAM32A	0.0338823	31183.8	2.19846	4.42322e+08	0.938877	0.759158
TRMT11	0.0339037	0.0696131	0.00593415	0.816627	0.0829268	0.759158
LAX1	0.0339347	24.3053	1.27384	463.752	0.769467	0.759158
EID1	0.034161	0.0230925	0.000706597	0.754694	0.0438516	0.759158
TXK	0.034211	0.0844537	0.00857294	0.83197	0.709166	0.759158
MTFR1	0.0342591	32.4354	1.29447	812.732	0.975469	0.759158
C1orf123	0.034305	8.35756e-05	1.39864e-08	0.499407	0.889748	0.759158
SLC18A3	0.0343314	38.8534	1.31013	1152.24	0.0310027	0.759158
IMPA2	0.0343951	5.94618	1.13997	31.0158	0.678618	0.759158
NUMB	0.0344595	0.0276995	0.000997424	0.769246	0.967753	0.759158
TMC6	0.0345007	0.000105403	2.16669e-08	0.512754	0.183382	0.759158
DUSP13	0.0345249	48.3424	1.32631	1762.02	0.285663	0.759158
APPL2	0.0345798	0.034225	0.00149623	0.782872	0.304871	0.759158
ALS2CR12	0.0346054	30.2829	1.28009	716.394	0.459909	0.759158
TBCB	0.0346143	3.1967e-07	3.01565e-13	0.338862	0.635467	0.759158
RNF44	0.0346467	0.000101196	1.98936e-08	0.514767	0.917495	0.759158
FLNB	0.034695	0.0718917	0.00624614	0.827458	0.556847	0.759158
RXRA	0.0347472	0.0186436	0.000462404	0.751691	0.652359	0.759158
AQP6	0.0347671	54.267	1.3309	2212.71	0.38691	0.759158
SCN10A	0.0347765	26.1284	1.26287	540.585	0.316875	0.759158
CTHRC1	0.0347906	0.0428647	0.00230113	0.798471	0.824388	0.759158
PTX3	0.0348071	14.3696	1.2095	170.718	0.723646	0.759158
DPP7	0.0348325	1534.3	1.68641	1.39591e+06	0.510773	0.759158
ZCCHC11	0.0348993	0.00883946	0.000109256	0.715164	0.185345	0.759158
HCLS1	0.0349566	5.3943e-08	9.48491e-15	0.306787	0.529139	0.759158
ADAMTS3	0.0349905	0.0322428	0.0013241	0.785137	0.065961	0.759158
TCTE1	0.0349955	44.2254	1.30577	1497.88	0.531526	0.759158
ELF4	0.0350629	0.0104764	0.000151055	0.726591	0.982759	0.759158
ISM1	0.0350778	0.0306084	0.00119578	0.783481	0.954255	0.759158
ACMSD	0.0351325	0.0868576	0.0089452	0.843385	0.337063	0.759158
IER2	0.0351719	2.45783e-06	1.48254e-11	0.407472	0.160367	0.759158
AMPH	0.0351782	0.0429778	0.00229851	0.803606	0.527985	0.759158
CYP4V2	0.0352238	0.00508578	3.72851e-05	0.693712	0.619121	0.759158
KLHL11	0.035261	13.4139	1.19636	150.4	0.322301	0.759158
UGT2B28	0.0353403	0.0255813	0.000841673	0.777501	0.29924	0.759158
SOS1	0.0354185	0.00118822	2.23587e-06	0.631462	0.0178724	0.759158
LGALS2	0.0354423	0.168305	0.0319831	0.885667	0.671469	0.759158
TRPM4	0.0355413	13.5723	1.1929	154.42	0.72824	0.759158
PTBP1	0.035575	537.478	1.52825	189028	0.56536	0.759158
NEDD9	0.0356944	0.00402515	2.34263e-05	0.691609	0.03868	0.759158
TCP10L	0.0357449	17.6334	1.21062	256.841	0.562599	0.759158
ADAM6	0.0357872	9.19848	1.15872	73.0217	0.571147	0.759158
CFB	0.0358244	54.2897	1.30269	2262.53	0.520003	0.759158
C1orf162	0.03583	0.0470419	0.00270903	0.816873	0.422618	0.759158
ENO2	0.0358677	0.0923778	0.00998596	0.854565	0.146949	0.759158
GJD2	0.0359301	35.7527	1.26475	1010.68	0.126496	0.759158
COL5A3	0.0360854	7.84579	1.14301	53.8547	0.080003	0.759158
LPHN1	0.036092	0.0473567	0.00273318	0.82053	0.875394	0.759158
ASTE1	0.0361124	0.024604	0.000769475	0.786713	0.489779	0.759158
ZNF609	0.036134	0.00676332	6.31804e-05	0.723998	0.161981	0.759158
ZNF217	0.0361807	0.0721592	0.00616763	0.844239	0.0950035	0.759158
LRRC17	0.0361905	90.985	1.33683	6192.47	0.671287	0.759158
SEC22C	0.0362107	0.018531	0.00044371	0.773928	0.0700608	0.759158
SMPD1	0.0362948	0.00371923	1.97696e-05	0.699697	0.182614	0.759158
TNK2	0.0363914	154.839	1.37636	17419.4	0.992433	0.759158
MAPK15	0.0365359	13.2465	1.17564	149.254	0.910977	0.759158
ADCY6	0.0365605	0.0593837	0.00420713	0.838202	0.602738	0.759158
FAM195B	0.0365831	0.157938	0.0279886	0.891235	0.881224	0.759158
PRKCQ	0.0366043	0.0174873	0.000393457	0.777224	0.252012	0.759158
FOXR1	0.0367283	11.6234	1.16331	116.138	0.718324	0.759158
HCP5	0.0367747	0.0125405	0.000205807	0.764134	0.276331	0.759158
FUT10	0.0369847	48.8262	1.26467	1885.07	0.255522	0.759158
TTLL10	0.0370174	4.26647	1.09131	16.6798	0.507878	0.759158
EFHC2	0.0370837	13.7421	1.16995	161.414	0.0407699	0.759158
SCP2	0.0371063	0.0100492	0.000132955	0.75955	0.0142957	0.759158
ARFGEF1	0.0371308	0.0146649	0.000276673	0.777307	0.22455	0.759158
TCL1B	0.0371417	3.72297	1.08151	12.8159	0.902282	0.759158
GNB3	0.0372782	5.20155	1.10206	24.5506	0.0027938	0.759158
RNF103	0.0373489	0.00830246	9.12668e-05	0.755267	0.571401	0.759158
GPR45	0.0373744	29.1048	1.21781	695.587	0.074709	0.759158
ALOXE3	0.0373853	140.982	1.33511	14887.1	0.909984	0.759158
DEPDC5	0.0374871	0.13112	0.0193386	0.889024	0.215067	0.759158
RCE1	0.0375585	56.0964	1.2608	2495.88	0.396368	0.759158
TBPL1	0.0375625	0.025552	0.000806247	0.809811	0.612608	0.759158
KLK10	0.0375742	168.109	1.34247	21051.3	0.946404	0.759158
TPM4	0.0377269	0.04315	0.00222526	0.836721	0.194433	0.759158
USP38	0.0377316	0.00252753	8.96688e-06	0.712443	0.915071	0.759158
TMEM97	0.0377325	51.9383	1.25098	2156.39	0.579538	0.759158
PIKFYVE	0.0377895	0.0241266	0.00071818	0.810512	0.243579	0.759158
LRRCC1	0.0378168	24.4067	1.19696	497.664	0.503834	0.759158
FIBP	0.0378264	4.41697e-06	3.90243e-11	0.499936	0.606312	0.759158
P2RY8	0.0378434	7.64538e-05	9.9521e-09	0.587331	0.0328814	0.759158
FAM46C	0.0378722	111.527	1.30213	9552.28	0.449264	0.759158
C16orf80	0.0378839	0.000695735	7.26995e-07	0.665819	0.727138	0.759158
PTPN6	0.0378873	3.2077e-06	2.08756e-11	0.492888	0.361617	0.759158
RPAP3	0.0379096	0.00735462	7.11546e-05	0.760182	0.0333953	0.759158
LSAMP	0.0379692	0.0309909	0.00116477	0.824569	0.0512547	0.759158
BMS1P5	0.0380152	0.0451	0.00241421	0.842516	0.463092	0.759158
MARCKSL1	0.038041	0.00294284	1.1945e-05	0.725015	0.950883	0.759158
TSPAN3	0.0381291	0.00639216	5.38781e-05	0.758373	0.280799	0.759158
RHOD	0.0381621	10.3263	1.1359	93.8757	0.374831	0.759158
FCGR3B	0.0382622	16.5766	1.16402	236.065	0.0384679	0.759158
MTHFR	0.0382797	18.0363	1.16905	278.268	0.0258236	0.759158
TBC1D15	0.0382853	33.276	1.20825	916.447	0.816568	0.759158
FRMD3	0.0382987	25.7748	1.19145	557.589	0.747267	0.759158
PUS7	0.0383497	20.4083	1.17566	354.267	0.142714	0.759158
PLEKHF2	0.0384395	0.00179554	4.51359e-06	0.714279	0.0364929	0.759158
SYNCRIP	0.0384408	0.00134211	2.56104e-06	0.703328	0.629098	0.759158
KIAA0100	0.0384714	22808.7	1.70318	3.05451e+08	0.610227	0.759158
SLC20A2	0.0385049	0.0363801	0.00157711	0.839205	0.0312846	0.759158
ATP6V1G3	0.0385139	0.0953575	0.0102957	0.883185	0.991292	0.759158
DNAJC10	0.038639	0.0101455	0.000130831	0.786746	0.0427447	0.760616
CNOT6	0.038748	0.00100103	1.43225e-06	0.699641	0.934872	0.761753
MIA2	0.0388276	61.7471	1.23569	3085.48	0.733208	0.762312
ZZZ3	0.0390211	0.000913068	1.18621e-06	0.70282	0.459583	0.765102
GADD45GIP1	0.0395734	61.6912	1.21737	3126.24	0.36094	0.765877
FXYD3	0.0397159	18.054	1.14577	284.478	0.413683	0.765877
KLK13	0.0397401	41.4521	1.19093	1442.8	0.103211	0.765877
PPIL2	0.0397492	0.0174754	0.000369174	0.827221	0.0112784	0.765877
SLC43A1	0.0397515	29.2797	1.17145	731.832	0.547979	0.765877
PDXDC1	0.0397749	0.014079	0.00024193	0.819316	0.673736	0.765877
SPAM1	0.0397841	63.3612	1.21381	3307.47	0.422931	0.765877
SCG5	0.0398508	0.0153245	0.000285061	0.823825	0.219798	0.765877
SIGLEC5	0.0399714	0.176612	0.03377	0.923659	0.769204	0.765877
MREG	0.0400629	0.0428132	0.00211461	0.86681	0.739831	0.765877
AVPI1	0.0401164	237.396	1.27982	44034.7	0.205405	0.765877
GDF5	0.0403507	9.40088	1.10358	80.0815	0.922316	0.765877
KPNA4	0.0404065	0.00779739	7.51727e-05	0.808795	0.582185	0.765877
LY6K	0.0404734	20.9126	1.14105	383.277	0.996329	0.765877
USP8	0.0404804	0.00676002	5.67548e-05	0.80518	0.123223	0.765877
ADCY7	0.0404914	0.0160951	0.000309785	0.83623	0.0398543	0.765877
VGF	0.0404986	8.51029	1.0971	66.0148	0.545558	0.765877
PALLD	0.0405526	0.160692	0.027935	0.924359	0.344164	0.765877
UBR7	0.0405703	0.00478477	2.87967e-05	0.795023	0.805056	0.765877
OR10H3	0.0406314	16.5354	1.12709	242.589	0.313572	0.765877
KIF13A	0.0406569	10.5365	1.10532	100.439	0.810602	0.765877
LIG4	0.0407165	0.0205813	0.000499098	0.848711	0.73919	0.765877
CALCA	0.0407231	872.804	1.33086	572401	0.162273	0.765877
SNAP23	0.040733	0.0461618	0.00242595	0.878382	0.237123	0.765877
IFNG	0.0407486	6.5446	1.08228	39.5755	0.109483	0.765877
TCF15	0.0407767	5.11057	1.07084	24.3902	0.532805	0.765877
PEX10	0.0408084	0.0839375	0.00781438	0.901608	0.0256706	0.765877
SH3GLB1	0.0408313	0.000593386	4.79964e-07	0.733612	0.936272	0.765877
TMEM119	0.0408383	0.00281341	1.01096e-05	0.782947	0.98662	0.765877
FOXG1	0.0408914	19.125	1.12998	323.694	0.0685641	0.765877
OCLM	0.0409758	71.6342	1.19145	4306.91	0.134667	0.765877
CIITA	0.0409775	0.0118169	0.000167506	0.833629	0.462626	0.765877
TMEM208	0.0410483	107.655	1.20957	9581.59	0.143267	0.765877
FGGY	0.0410676	23.2695	1.1362	476.563	0.533136	0.765877
HIST1H4I	0.041103	7.32745	1.0838	49.5402	0.656137	0.765877
ATP5F1	0.0413072	1688.06	1.34054	2.12567e+06	0.407685	0.765877
STK17B	0.0413183	0.0107859	0.000139056	0.836613	0.967952	0.765877
PSMA2	0.0413346	209.913	1.23388	35711.2	0.626095	0.765877
MON1A	0.041409	0.0801819	0.00709325	0.906373	0.424096	0.765877
LRIT1	0.0414232	35.1381	1.14845	1075.08	0.706614	0.765877
CD1E	0.0415473	0.0892056	0.00872945	0.911585	0.0710608	0.765877
SCN4A	0.0417824	8.64996	1.08356	69.052	0.677309	0.765877
KPNA5	0.0417877	0.0878306	0.00844416	0.913557	0.00740344	0.765877
KLHDC10	0.0417964	548.895	1.2639	238377	0.851885	0.765877
TKTL2	0.041903	0.0700447	0.00540807	0.907212	0.245199	0.765877
MEIS3	0.0419202	7.83324	1.07813	56.9131	0.531502	0.765877
BST1	0.0419456	0.129981	0.0181987	0.92837	0.324632	0.765877
STYX	0.0420141	0.0103181	0.000125579	0.847773	0.920187	0.765877
ABHD6	0.0420203	0.00458877	2.55711e-05	0.823459	0.242812	0.765877
ZNF436	0.0420207	0.0452204	0.00228653	0.894318	0.797101	0.765877
CLU	0.0420395	0.0425488	0.00202822	0.892604	0.571465	0.765877
SLC38A1	0.0421555	733.026	1.26342	425298	0.795501	0.765877
RPN2	0.0423382	1.57954e+11	2.43958	1.0227e+22	0.643489	0.765877
CXCL11	0.0423848	5.84237	1.06254	32.1241	0.0557731	0.765877
SERGEF	0.0423963	0.107788	0.0125411	0.926409	0.000365839	0.765877
ABCC5	0.0424272	54.9569	1.14672	2633.83	0.017094	0.765877
XYLT2	0.0424446	38.8383	1.13286	1331.51	0.187561	0.765877
FKBP4	0.0425707	56.5837	1.14476	2796.84	0.0280961	0.765877
STEAP4	0.0427199	6.27928	1.06212	37.1233	0.0665268	0.765877
MEOX1	0.0427542	0.0531299	0.00310662	0.908638	0.945066	0.765877
CHIC2	0.0428694	0.0815056	0.00720002	0.92266	0.0192191	0.765877
CD74	0.042882	3.19796e-24	5.79062e-47	0.176613	0.785313	0.765877
USF1	0.0428921	4.15079	1.0466	16.4619	0.87334	0.765877
CRYZL1	0.0429104	0.0202482	0.000464331	0.88297	0.0321345	0.765877
PEX14	0.0429331	0.0504544	0.00279937	0.909366	0.0478516	0.765877
FBLN2	0.0429535	0.209514	0.046127	0.951638	0.708206	0.765877
CD58	0.0430089	0.0230554	0.00059848	0.888169	0.00546756	0.765877
FADS3	0.0430942	0.07521	0.00612993	0.922774	0.380263	0.765877
KIRREL2	0.0431073	12.6615	1.08188	148.18	0.714219	0.765877
HDAC1	0.043129	2.95283e-11	1.84439e-21	0.472743	0.124389	0.765877
VAMP5	0.0433032	48.4498	1.12387	2088.67	0.00224932	0.765877
PPAT	0.0433196	22.5263	1.098	462.144	0.11044	0.765877
TMEM106C	0.0433226	121.515	1.1549	12785.4	0.228651	0.765877
ZNF254	0.0434242	0.00411897	1.99534e-05	0.850277	0.2142	0.765877
KCNJ14	0.0434329	38.813	1.11394	1352.36	0.787952	0.765877
TRIM15	0.0434398	145.403	1.158	18257.3	0.680358	0.765877
TYRO3	0.0434674	8.75363	1.0657	71.9019	0.125892	0.765877
SESTD1	0.0434799	0.0142874	0.000231162	0.883056	0.314412	0.765877
CDH6	0.0434817	85.0638	1.13887	6353.51	0.565706	0.765877
CSF2	0.0434901	9.88518	1.06925	91.388	0.355859	0.765877
NOP2	0.0435285	1868.27	1.24461	2.80445e+06	0.235415	0.765877
ZNF497	0.0436018	0.0410911	0.00185052	0.912431	0.521725	0.765877
MRVI1	0.0437707	13.5886	1.0756	171.673	0.0287203	0.765877
TBX15	0.0438217	13.9	1.07561	179.627	0.251644	0.765877
PCNX	0.043825	0.000408565	2.07169e-07	0.805746	0.140987	0.765877
WWC3	0.0438273	209.185	1.15933	37744.3	0.607843	0.765877
DGKE	0.0439546	126.475	1.14006	14030.8	0.337535	0.765877
APH1B	0.0440068	153.29	1.14463	20528.8	0.242896	0.765877
METTL10	0.0440297	0.00329096	1.2619e-05	0.858262	0.0529608	0.765877
CSNK1A1	0.04417	0.0064027	4.67696e-05	0.876522	0.0764508	0.765877
EDEM1	0.0442487	0.0115242	0.000148969	0.891505	0.0222899	0.765877
PRKCH	0.0444275	0.0263358	0.000759343	0.913388	0.78104	0.765877
MRPS23	0.0444335	27.4961	1.08596	696.19	0.818479	0.765877
INO80C	0.0444371	0.00065836	5.20044e-07	0.833463	0.765646	0.765877
UBL3	0.0444543	0.0819797	0.00715055	0.939882	0.0215343	0.765877
TUBGCP5	0.0444956	0.0524767	0.00296087	0.930065	0.968041	0.765877
PTH2R	0.0445417	0.18131	0.0342712	0.959213	0.844798	0.765877
CTDSP1	0.0446402	0.000547336	3.58577e-07	0.835461	0.953727	0.765877
HPCA	0.0447623	5.95427	1.04259	34.0051	0.637037	0.765877
FPR2	0.0447714	28.3472	1.08118	743.231	0.373693	0.765877
ZNF765	0.0448814	0.0574039	0.0035174	0.93683	0.364613	0.765877
SPARC	0.0449172	0.0523468	0.00292971	0.935311	0.294463	0.765877
SYTL1	0.0450286	0.0472876	0.00239258	0.934606	0.815829	0.765877
RBMS2	0.0450626	88.6718	1.10374	7123.68	0.0712772	0.765877
C6orf62	0.0450852	0.00148999	2.56028e-06	0.867119	0.707208	0.765877
ICOS	0.0451346	0.155585	0.0252031	0.960466	0.527738	0.765877
UNC119	0.0451551	0.107708	0.0121727	0.953036	0.928413	0.765877
PTAFR	0.0451659	0.0479281	0.00245244	0.936663	0.808225	0.765877
AEN	0.0452121	69.1616	1.09456	4370.1	0.0789001	0.765877
TRIM26	0.0453076	0.00199469	4.53068e-06	0.878186	0.0393407	0.765877
ARMCX2	0.0453146	5.08348	1.0345	24.9799	0.351731	0.765877
CREBZF	0.0453571	0.115605	0.013974	0.956387	0.00524188	0.765877
SF3B5	0.0454541	0.00734243	5.95455e-05	0.90538	0.920836	0.765877
MTIF3	0.0455165	1015.98	1.14808	899079	0.798948	0.765877
BIN3	0.045598	20.4058	1.06081	392.526	0.922804	0.765877
C4orf27	0.0456931	0.0119658	0.00015584	0.918765	0.787375	0.765877
RPGRIP1L	0.0457182	12.9853	1.05	160.588	0.0735168	0.765877
HNRNPR	0.045728	0.00103397	1.21813e-06	0.877645	0.23541	0.765877
USP10	0.0457331	0.0220532	0.000522823	0.930225	0.133381	0.765877
FANCM	0.0457342	0.0234711	0.000591503	0.931343	0.316343	0.765877
BRD7P3	0.0457803	96.6187	1.08948	8568.5	0.504068	0.765877
TRMT61A	0.0457814	18.6514	1.05638	329.31	0.744048	0.765877
BAI2	0.0457964	0.137036	0.0194891	0.963562	0.102799	0.765877
ASXL1	0.0458181	1129.63	1.13951	1.11984e+06	0.511935	0.765877
ACTN4	0.0458428	3.26403e-05	1.28929e-09	0.826336	0.592214	0.765877
RAPGEF3	0.0458525	37.5658	1.06908	1320	0.504422	0.765877
SMR3A	0.045854	6.58142	1.03531	41.8378	0.320749	0.765877
CD163	0.045865	5.08092	1.0303	25.0565	0.245967	0.765877
SOX15	0.0459025	44.9542	1.0717	1885.68	0.243626	0.765877
ACP2	0.0459504	213.844	1.10127	41524	0.0242918	0.765877
LGMN	0.0459644	25.8027	1.05997	628.112	0.557342	0.765877
IGSF6	0.0461072	11.6788	1.04336	130.726	0.215914	0.765877
CCL1	0.0461477	48.2435	1.06848	2178.26	0.303089	0.765877
CTRC	0.0462157	18.9429	1.0506	341.55	0.864576	0.765877
WDFY4	0.0462202	2.19757e-05	5.78047e-10	0.835453	0.181115	0.765877
TNS3	0.0462493	40.9757	1.0637	1578.46	0.0585622	0.765877
SMPD3	0.046274	0.0709579	0.00525996	0.957237	0.140378	0.765877
F2RL2	0.0463115	0.0824952	0.00708883	0.960026	0.555921	0.765877
TAS2R16	0.0463119	30.7108	1.05758	891.797	0.524779	0.765877
PCDHGA1	0.0463887	48.7733	1.06418	2235.36	0.150369	0.765877
ADCY3	0.0465173	33.2186	1.05552	1045.43	0.748819	0.765877
RGMA	0.0465752	20.2679	1.04669	392.465	0.517808	0.765877
SENP6	0.0466464	0.0162528	0.000280809	0.940681	0.0222049	0.765877
HS3ST2	0.0466489	10.3094	1.03521	102.668	0.664062	0.765877
EDA	0.0467207	57.0028	1.06042	3064.17	0.510491	0.765877
INSC	0.0467387	11.3617	1.03569	124.64	0.517865	0.765877
PRAP1	0.0467532	18.6165	1.0429	332.317	0.801583	0.765877
NPLOC4	0.0468951	71.0163	1.06027	4756.63	0.0364985	0.765877
ZFYVE1	0.0469026	0.00104222	1.19332e-06	0.910248	0.408516	0.765877
ATP6AP1L	0.0469126	0.151222	0.0234654	0.974544	0.343158	0.765877
SRD5A3	0.0469418	32.6081	1.04824	1014.36	0.957939	0.765877
MOCS3	0.0469581	12.1604	1.03416	142.99	0.617525	0.765877
MED13	0.0470491	0.00268533	7.78968e-06	0.925713	0.0247846	0.765877
LDLRAP1	0.0470641	0.105201	0.0113953	0.971211	0.96231	0.765877
LANCL1	0.0471032	0.0192665	0.000390441	0.950715	0.825609	0.765877
ZNF644	0.0471769	0.000107581	1.29701e-08	0.89233	0.839493	0.765877
A1CF	0.0473291	68.5301	1.05109	4468.09	0.643469	0.765877
FAH	0.0475191	13.1711	1.02861	168.653	0.888659	0.765877
ACRC	0.0475966	231.027	1.05936	50382.7	0.514092	0.765877
FGG	0.0476085	20.2265	1.03221	396.347	0.769307	0.765877
CD33	0.0478597	7.0344	1.01856	48.5813	0.150801	0.765877
SLC6A5	0.0478876	12.273	1.0236	147.155	0.724334	0.765877
EGFR	0.0479215	415.111	1.05671	163069	0.775269	0.765877
LY9	0.0479767	0.0166823	0.000288631	0.964204	0.262937	0.765877
GGA1	0.0480145	459.164	1.05502	199838	0.542465	0.765877
WNK2	0.0480373	3.64971	1.01124	13.1723	0.158081	0.765877
TIGIT	0.0480698	0.00931674	9.03178e-05	0.96107	0.148858	0.765877
CORO2A	0.0480733	0.112738	0.0129471	0.981668	0.723448	0.765877
LSM14B	0.0480884	0.0104588	0.000113663	0.962375	0.352581	0.765877
CNPY2	0.0483726	334.58	1.04244	107386	0.959861	0.765877
ZNF844	0.0484148	0.0799961	0.00651293	0.982564	0.627758	0.765877
ERCC1	0.0485819	0.00740936	5.66009e-05	0.969924	0.186154	0.765877
USE1	0.0486253	0.0213981	0.000468625	0.977069	0.145028	0.765877
KLHL6	0.0486362	0.00317873	1.04583e-05	0.966159	0.160284	0.765877
FCHO1	0.0487204	0.14904	0.0224517	0.989369	0.221325	0.765877
CRIPAK	0.0487633	0.0109297	0.000122422	0.975795	0.376185	0.765877
BNIP2	0.0487919	0.000776851	6.26836e-07	0.962768	0.0114919	0.765877
PHF2	0.048835	0.0102488	0.000107524	0.976869	0.730759	0.765877
CBFA2T2	0.0488561	0.0293338	0.000875842	0.982454	0.019934	0.765877
ETNK1	0.0489324	0.0124601	0.000158474	0.979686	0.699106	0.765877
SBNO1	0.0489465	0.0067803	4.7045e-05	0.977202	0.417937	0.765877
ITM2C	0.0489511	0.0643527	0.00419384	0.987465	0.082076	0.765877
SMEK1	0.0489971	0.0718119	0.00521699	0.98849	0.0415867	0.765877
PTPN18	0.0490529	0.0240037	0.000585165	0.984642	0.809057	0.765877
HNRNPD	0.049145	9.82865e-05	9.99991e-09	0.966032	0.543851	0.765877
SLC22A5	0.0492208	5.12661	1.00559	26.1359	0.611426	0.765877
NET1	0.0492224	0.0846152	0.00722019	0.991626	0.970979	0.765877
ADAM21	0.0492797	26.0864	1.01034	673.537	0.545387	0.765877
NUDT22	0.0492942	0.019595	0.000388657	0.987923	0.94796	0.765877
DIDO1	0.0492995	0.00630863	4.04218e-05	0.984588	0.373673	0.765877
ACVR2B	0.0493133	13.0715	1.00776	169.55	0.329605	0.765877
PHKA1	0.0493245	10.5539	1.00699	110.612	0.0251008	0.765877
SERPINB7	0.0493365	220.339	1.01579	47794.4	0.0541545	0.765877
UFC1	0.049377	887159	1.03804	7.58208e+11	0.179866	0.765877
ARAF	0.0493841	70.8524	1.01155	4962.74	0.987491	0.765877
ATXN7	0.049409	0.0144614	0.000211436	0.989106	0.00616611	0.765877
PAG1	0.0495792	0.0121535	0.000148911	0.99192	0.186704	0.765877
HOPX	0.0495845	0.211098	0.0446883	0.997178	0.727091	0.765877
FAM84B	0.0496368	0.0571258	0.00327822	0.995465	0.637192	0.765877
ZNF408	0.0497148	49.7938	1.00488	2467.37	0.926886	0.765877
CSGALNACT1	0.0497312	0.162666	0.0265168	0.997869	0.32665	0.765877
CMKLR1	0.0497799	45.69	1.00368	2079.92	0.0112229	0.765877
HERC5	0.0498111	23.3061	1.0026	541.764	0.107339	0.765877
POLR3C	0.0498761	904.236	1.00369	814636	0.49433	0.765877
ZNF230	0.049903	0.16705	0.0279267	0.999242	0.0466681	0.765877
BIRC6	0.0499142	1.73346e-07	3.02246e-14	0.994186	0.00101457	0.765877
EDN2	0.0499904	0.00943304	8.89997e-05	0.999804	0.766558	0.765877
NOC2L	0.0500805	126.963	0.998301	16147	0.387714	0.765877
PRDM8	0.050198	1999.74	0.993458	4.02528e+06	0.549335	0.765877
ASB13	0.0502763	0.199845	0.0398608	1.00194	0.908345	0.765877
TRERF1	0.0504988	0.0547409	0.00297771	1.00633	0.12968	0.765877
ARSA	0.0505064	36.4114	0.992101	1336.35	0.555382	0.765877
HES5	0.0505065	0.106356	0.0112557	1.00496	0.625912	0.765877
ACAT2	0.0505184	0.0064666	4.13435e-05	1.01145	0.0423286	0.765877
DNM1L	0.0505475	0.00806949	6.43726e-05	1.01156	0.74721	0.765877
FOSL1	0.0505987	13.7727	0.993186	190.989	0.739202	0.765877
SERPINB13	0.0506054	24.9455	0.991557	627.576	0.307257	0.765877
NDUFA8	0.0507156	1493.81	0.977492	2.28284e+06	0.126385	0.765877
ZEB2	0.0507745	68.0969	0.985875	4703.63	0.17887	0.765877
PEX19	0.0507931	51.0106	0.986523	2637.63	0.996718	0.765877
GMEB1	0.0508071	0.073692	0.00538101	1.0092	0.145312	0.765877
NSFL1C	0.050867	2143.37	0.971488	4.72887e+06	0.366308	0.765877
FOXA1	0.0508967	20.1319	0.988359	410.067	0.278538	0.765877
ARFIP1	0.0509007	0.01751	0.000301781	1.01597	0.149342	0.765877
OR7E37P	0.051055	23.4118	0.985644	556.096	0.137297	0.765877
KCND1	0.0510874	7.90101	0.99028	63.0387	0.718862	0.765877
GPR183	0.0511989	0.137949	0.0188346	1.01037	0.64765	0.765877
GLCE	0.0512824	4.59603	0.991542	21.3037	0.264258	0.765877
ZNF605	0.0513315	12.4046	0.985547	156.132	0.28802	0.765877
BLOC1S3	0.0514165	20.0913	0.981723	411.176	0.960388	0.765877
C1orf122	0.0514562	77.2333	0.972904	6131.1	0.154226	0.765877
NUDT12	0.0514901	0.121469	0.0145549	1.01372	0.141006	0.765877
DNAJC17	0.0514919	0.0205723	0.000412712	1.02546	0.182784	0.765877
ABHD4	0.0517213	40.5502	0.972748	1690.39	0.248132	0.765877
OR1E1	0.0517539	16.8579	0.978752	290.359	0.488732	0.765877
ROM1	0.0518623	50.5297	0.968843	2635.36	0.0882541	0.765877
UHRF1BP1	0.0518921	0.0331428	0.00106819	1.02832	0.616231	0.765877
POLR2K	0.0519466	0.0217819	0.000459389	1.03279	0.00796249	0.765877
H2AFV	0.0520021	0.00434864	1.80397e-05	1.04828	0.744419	0.765877
SCNN1G	0.0520107	103.612	0.960397	11178.1	0.866744	0.765877
PACSIN2	0.0520268	115.007	0.95921	13789.1	0.515775	0.765877
SPATA13	0.0521007	0.100943	0.00997929	1.02107	0.227079	0.765877
AP2S1	0.0521127	3443.1	0.928224	1.27716e+07	0.0625113	0.765877
CACNB1	0.0521154	43.9645	0.965949	2001.01	0.860453	0.765877
CNN2	0.0521372	0.0121353	0.000141376	1.04165	0.768514	0.765877
OR12D3	0.0521848	10.3461	0.97815	109.433	0.248898	0.765877
APOL2	0.0521908	30.8509	0.968012	983.23	0.13408	0.765877
FGFBP1	0.0522103	14.2047	0.974939	206.961	0.639098	0.765877
ST8SIA3	0.0523985	51.7467	0.959898	2789.59	0.181229	0.765877
MIXL1	0.0524411	0.305633	0.0922503	1.01259	0.21256	0.765877
BCO2	0.0525329	4.80742	0.982959	23.512	0.505529	0.765877
C17orf100	0.0525526	0.0750522	0.00547421	1.02898	0.0551444	0.765877
ING2	0.0525605	158.73	0.945475	26648	0.666728	0.765877
PRPF39	0.0526005	0.0392737	0.00148733	1.03704	0.791475	0.765877
KRT33A	0.052614	122.07	0.947183	15731.9	0.92605	0.765877
DLX4	0.0527562	43.7977	0.956013	2006.5	0.810613	0.765877
GPR64	0.052761	0.0877828	0.00748552	1.02943	0.377941	0.765877
KLF5	0.052985	20.7162	0.961717	446.246	0.746614	0.765877
SUV420H1	0.0529975	0.00443632	1.83492e-05	1.07258	0.0425321	0.765877
MITD1	0.0530249	9.06698e-05	7.28072e-09	1.12915	0.441537	0.765877
PAK7	0.0530998	102.484	0.939986	11173.5	0.448927	0.765877
WDTC1	0.053246	0.0247308	0.000580759	1.05313	0.99344	0.765877
NEUROD6	0.0532864	18.626	0.959425	361.599	0.197182	0.765877
RGS4	0.0532884	0.077054	0.00572551	1.03699	0.0945113	0.765877
RNGTT	0.0532916	0.0637738	0.00391137	1.03982	0.445198	0.765877
IL33	0.0533251	0.146021	0.0207424	1.02795	0.279891	0.765877
SLC7A2	0.0533324	0.0497855	0.00237409	1.04402	0.35054	0.765877
HKR1	0.0533442	0.00562309	2.93446e-05	1.07751	0.397449	0.765877
CFL1	0.0533578	0.0176504	0.000293863	1.06014	0.580126	0.765877
SMTNL2	0.0533913	32.2572	0.950518	1094.69	0.631565	0.765877
LRCH1	0.053467	0.0149797	0.00021075	1.06474	0.578283	0.765877
CDK9	0.0534855	0.0198898	0.000373013	1.06057	0.268995	0.765877
C12orf43	0.053493	0.0365547	0.00127137	1.05103	0.526792	0.765877
DYNC1LI1	0.0535001	0.00628942	3.66473e-05	1.07939	0.486937	0.765877
EIF2AK3	0.0535247	40.9388	0.945221	1773.11	0.91099	0.765877
KLHL26	0.0535744	0.0568104	0.00308808	1.04512	0.571653	0.765877
SYN1	0.0535811	12.1145	0.962276	152.515	0.326735	0.765877
C10orf32	0.0536333	0.0222599	0.000466879	1.06131	0.433225	0.765877
ESR1	0.0537685	46.0226	0.939812	2253.72	0.857618	0.765877
TRABD	0.0537703	0.0202041	0.000383174	1.06533	0.291775	0.765877
LRRC37A3	0.0537983	29.8411	0.94603	941.29	0.676526	0.765877
SLC38A11	0.0538172	0.028815	0.000783336	1.05996	0.931288	0.765877
PDCD2	0.053872	0.000858289	6.54954e-07	1.12475	0.06304	0.765877
OTX1	0.0538999	0.184491	0.0330857	1.02875	0.246621	0.765877
MT3	0.0539123	4.44183	0.975231	20.231	0.899259	0.765877
SLC39A14	0.0540546	11.8439	0.957846	146.452	0.108684	0.765877
TCF7L1	0.0540778	14.1524	0.95463	209.809	0.205207	0.765877
RASGRP4	0.0541131	11.4546	0.957825	136.985	0.0755142	0.765877
KCNH4	0.0541982	34.974	0.937916	1304.15	0.825618	0.765877
TTC16	0.0542189	23.1705	0.944646	568.334	0.0218541	0.765877
ZNF749	0.0543145	205.624	0.906057	46665	0.552672	0.765877
FAM43A	0.0543816	0.000259145	5.74958e-08	1.16801	0.384848	0.765877
GLOD4	0.0544097	0.00124143	1.35783e-06	1.13501	0.895089	0.765877
GPR97	0.0545141	22.9289	0.941142	558.613	0.484362	0.765877
CEP63	0.0546697	0.00516642	2.40211e-05	1.11119	0.121665	0.765877
CHST5	0.0546895	40.7896	0.928153	1792.59	0.0728172	0.765877
GLS2	0.0547396	9.66118	0.954966	97.74	0.439704	0.765877
SIGLEC6	0.0547499	5.20831	0.966959	28.0534	0.625711	0.765877
TMEM217	0.05475	0.115132	0.0126847	1.04499	0.971797	0.765877
MLLT1	0.0547647	744.501	0.873676	634425	0.679157	0.765877
YTHDC2	0.0548009	0.00371756	1.23175e-05	1.122	0.149247	0.765877
ALOX5	0.0548016	0.0726077	0.0049949	1.05545	0.0317413	0.765877
PDX1	0.0548333	70.5565	0.915619	5437	0.177017	0.765877
C19orf70	0.0548483	809.908	0.870121	753862	0.204323	0.765877
CTSG	0.0548742	10.0541	0.952945	106.077	0.0287507	0.765877
WDR41	0.0548865	29.7169	0.931456	948.079	0.42141	0.765877
RFWD2	0.0551144	9.94761e-05	8.08751e-09	1.22355	0.470712	0.765877
GNPDA1	0.0551174	34.6824	0.925257	1300.04	0.0118186	0.765877
BDNF	0.0551475	20.7396	0.93538	459.847	0.423079	0.765877
MATN3	0.0552524	41.6753	0.919595	1888.69	0.645	0.765877
REPS1	0.0554337	0.0205042	0.000384117	1.09452	0.877793	0.765877
CNOT8	0.0554676	0.0122147	0.000134601	1.10846	0.0138652	0.765877
VPS29	0.0555312	7.24798e-08	3.56153e-15	1.47502	0.923572	0.765877
EIF2S3	0.0555426	0.0248665	0.000566527	1.09146	0.301408	0.765877
PPP1R14A	0.0556258	5.61385	0.959377	32.8497	0.509651	0.765877
SHPRH	0.0556393	0.0193196	0.00033939	1.09976	0.0576599	0.765877
SLITRK2	0.0556546	17.0095	0.93383	309.823	0.858617	0.765877
EGFLAM	0.0556926	27.9554	0.9222	847.432	0.374388	0.765877
SENP7	0.0557358	0.038968	0.00140246	1.08274	0.0605933	0.765877
RAB35	0.0557541	0.00406181	1.44103e-05	1.1449	0.474449	0.765877
ARPC5	0.0557899	3.96742e-11	8.7064e-22	1.80791	0.389315	0.765877
MAP2K1	0.055801	0.0243722	0.000541791	1.09637	0.41588	0.765877
TTC8	0.0558215	15.3235	0.934405	251.294	0.0755568	0.765877
PRTG	0.0558399	7.5687	0.950785	60.2504	0.389433	0.765877
ZFAND2A	0.0559025	1195.5	0.836487	1.70861e+06	0.275397	0.765877
RNASEL	0.0559069	0.025926	0.000613022	1.09647	0.00261224	0.765877
PFN1	0.0560236	2.63895e-37	7.99335e-75	8.71233	0.828312	0.765877
ABCA6	0.0560381	0.127686	0.0154617	1.05445	0.442439	0.765877
YPEL3	0.0561332	0.0073265	4.71999e-05	1.13724	0.17428	0.765877
OR2J3	0.0561728	13.9329	0.933005	208.066	0.874987	0.765877
SOX4	0.0562307	0.0511356	0.00241626	1.08219	0.152631	0.765877
C1orf101	0.0562477	0.0775803	0.0056225	1.07047	0.876472	0.765877
NRL	0.0563261	8.28565	0.94458	72.6798	0.482959	0.765877
WIPF1	0.0563314	0.0126327	0.000141827	1.12521	0.0245068	0.765877
SULF1	0.0563403	0.204706	0.0401462	1.04379	0.328379	0.765877
TM4SF5	0.0563675	15.89	0.927698	272.172	0.686702	0.765877
DOCK7	0.0564122	42.9649	0.90236	2045.73	0.662533	0.765877
S100A8	0.0565265	7.37284	0.945979	57.463	1.48905e-05	0.765877
RHBDD3	0.0565735	7.31564	0.945815	56.5846	0.225697	0.765877
TWF2	0.0566306	0.0118768	0.000124465	1.13332	0.484393	0.765877
TINAGL1	0.0566475	0.094319	0.00832105	1.0691	0.230994	0.765877
DDIT3	0.0566611	40.8762	0.900123	1856.26	0.128221	0.765877
TTYH1	0.0567601	119.415	0.871454	16363.3	0.736478	0.765911
ZNF506	0.0567665	0.0261209	0.000614316	1.11067	0.123354	0.765911
CABLES1	0.0570688	46.7273	0.890898	2450.83	0.11741	0.769291
FGFR4	0.0572109	42.2203	0.891649	1999.17	0.750574	0.77027
MKNK2	0.0572449	0.000427074	1.43645e-07	1.26974	0.840204	0.77027
BCKDK	0.0573119	70.7127	0.876109	5707.37	0.0263642	0.770475
IFT172	0.0574406	9.01821	0.932882	87.1793	0.366057	0.770628
ARL8B	0.0574574	0.0185662	0.000303832	1.13452	0.508051	0.770628
PPCS	0.0575201	0.00707222	4.27041e-05	1.17123	0.30481	0.770628
CD83	0.0575414	0.00175844	2.52392e-06	1.22512	0.987167	0.770628
LECT2	0.0576215	23.4603	0.902994	609.512	0.732184	0.770628
NFAM1	0.0577897	47.6529	0.880171	2579.96	0.545661	0.770628
SPG20	0.0578419	33.2753	0.890002	1244.1	0.544131	0.770628
MRPL52	0.0578933	1575.49	0.781649	3.17555e+06	0.834303	0.770628
GH2	0.0578999	0.00993964	8.46598e-05	1.16698	0.810272	0.770628
RRBP1	0.0579152	105.05	0.855419	12900.8	0.169687	0.770628
GDE1	0.0579425	0.189788	0.0340596	1.05754	0.358122	0.770628
FMNL3	0.0579686	0.0115919	0.000115593	1.16246	0.00551484	0.770628
CTDSPL2	0.0580332	0.00720136	4.38429e-05	1.18285	0.135345	0.770628
PTPN14	0.0580482	0.173434	0.0283351	1.06156	0.204738	0.770628
RFX5	0.0582487	0.000911056	6.49982e-07	1.27699	0.775294	0.77082
RNF19B	0.0583742	0.0613667	0.00341121	1.10397	0.218622	0.77082
SLC38A10	0.0583851	74.9168	0.857981	6541.55	0.530418	0.77082
ALX1	0.0584091	107.896	0.846555	13751.7	0.0859053	0.77082
FNBP1	0.0584904	0.000811419	5.09884e-07	1.29127	0.0144064	0.77082
KAL1	0.0585199	0.111602	0.0115085	1.08224	0.248988	0.77082
TEAD2	0.0585205	20.2266	0.897285	455.948	0.376764	0.77082
TET1	0.0585481	0.0736003	0.00492934	1.09893	0.395439	0.77082
ARRDC3	0.0586094	0.0975192	0.00873726	1.08844	0.214137	0.77082
GRN	0.0586948	283.367	0.812558	98820.1	0.130893	0.77082
TLE6	0.0587138	8.65127	0.923594	81.0361	0.630227	0.77082
CYMP	0.0587149	9.87691	0.919088	106.141	0.488266	0.77082
PKDREJ	0.0587361	76.3653	0.852056	6844.22	0.5075	0.77082
TP53INP2	0.0588093	0.0358124	0.00113302	1.13196	0.391021	0.771102
HOXC4	0.0588707	14.1871	0.905371	222.311	0.227238	0.771228
NCOA3	0.0590686	0.075498	0.00516303	1.10399	0.0920051	0.772307
SPACA3	0.0590708	0.110112	0.0111423	1.08817	0.29868	0.772307
ATM	0.0591089	0.011358	0.000108598	1.18791	0.101424	0.772307
UBE3B	0.0592219	0.00483032	1.8959e-05	1.23066	0.896667	0.772833
SLC16A9	0.0593838	21.4571	0.885718	519.81	0.741518	0.772833
MAPKAPK5	0.0594433	0.00858255	6.09456e-05	1.20862	0.0974385	0.772833
TRIP4	0.0594511	0.0171758	0.000250891	1.17584	0.0482582	0.772833
GPR182	0.0594523	12.1964	0.905112	164.346	0.655097	0.772833
COL5A2	0.0594978	0.14465	0.0193648	1.0805	0.900107	0.772833
FAM26E	0.0595126	0.0867988	0.00683053	1.10299	0.820561	0.772833
C15orf56	0.0596313	41.6696	0.859506	2020.18	0.442748	0.773098
AREG	0.0596488	94.8276	0.831022	10820.7	0.0170403	0.773098
PINX1	0.0597297	17.899	0.888471	360.59	0.759698	0.773098
ARPC2	0.0597408	2.21089e-06	2.86449e-12	1.70643	0.142964	0.773098
RBM33	0.0598559	0.0147417	0.000182421	1.19129	0.174533	0.773462
PDLIM5	0.0598729	0.00872844	6.25554e-05	1.21789	0.795752	0.773462
TADA2A	0.0601601	253.228	0.789333	81238.6	0.581715	0.775201
XKR7	0.0602683	7.15311	0.91854	55.7047	0.032763	0.775201
NECAP2	0.0603259	0.064408	0.00368268	1.12646	0.049302	0.775201
STAT4	0.0603725	0.0367609	0.00117006	1.15495	0.314767	0.775201
RER1	0.0603735	0.00135311	1.37263e-06	1.33387	0.746525	0.775201
RDH16	0.0604085	7.6514	0.914811	63.9956	0.354302	0.775201
OSBPL11	0.0604259	0.0496992	0.00216554	1.1406	0.277247	0.775201
POF1B	0.0604771	8.02369	0.912382	70.5622	0.0383608	0.775201
FAM134C	0.0605048	4178.74	0.692061	2.52317e+07	0.592181	0.775201
NLGN3	0.0605329	0.187609	0.0326845	1.07688	0.913032	0.775201
NKD1	0.0605805	9.67155	0.904047	103.467	0.940409	0.775201
WFDC5	0.0608576	8.08115	0.909159	71.83	0.877594	0.778078
VIT	0.0609408	12.6655	0.889968	180.247	0.0244948	0.778472
ENTPD6	0.0610362	14.0154	0.884936	221.973	0.2237	0.778639
KAT2B	0.0610585	0.0393429	0.00133213	1.16194	0.00210528	0.778639
SH3BGR	0.0612458	0.0504345	0.00220949	1.15123	0.00176538	0.78036
AKR1C3	0.0614547	0.102124	0.00934759	1.11572	0.606595	0.781794
TRPC7	0.0614635	20.8519	0.864262	503.092	0.07764	0.781794
RBM46	0.061735	17.2722	0.869398	343.145	0.0987981	0.783875
SYCE1L	0.0617495	18.5677	0.866168	398.028	0.515764	0.783875
JTB	0.0619195	5.54435e+06	0.461017	6.66784e+13	0.929645	0.783875
WNT11	0.0619445	32.0133	0.840978	1218.64	0.587265	0.783875
LIG3	0.0620255	51.6556	0.820056	3253.8	0.967448	0.783875
ZNF404	0.0620586	0.23643	0.0519785	1.07543	0.625215	0.783875
CEP57	0.0620775	0.0261488	0.000568831	1.20204	0.0769955	0.783875
KIAA2018	0.0620883	0.00406564	1.25145e-05	1.32083	0.846754	0.783875
GRIN2C	0.0621011	11.8421	0.882447	158.917	0.0352974	0.783875
NR3C2	0.062198	0.110394	0.0108916	1.11891	0.0800493	0.784433
ZNF445	0.0623685	0.0194528	0.000308714	1.22577	0.580847	0.784708
AQP9	0.0623727	7.58922	0.900544	63.9572	0.0315033	0.784708
BYSL	0.0624136	4.7493	0.922392	24.4537	0.115173	0.784708
GCM2	0.0624308	14.6569	0.869878	246.958	0.066699	0.784708
FAM50A	0.0625847	1236.87	0.687914	2.22391e+06	0.035801	0.785979
XCR1	0.0627899	16.9586	0.859801	334.491	0.712988	0.787082
MSR1	0.0628942	25.8762	0.839491	797.6	0.568233	0.787082
SLFN12	0.0629402	0.167509	0.0254803	1.10122	0.562941	0.787082
KIR3DL1	0.0629426	10.1976	0.882203	117.877	0.692489	0.787082
CTNNA3	0.062999	0.0249984	0.000511676	1.22132	0.965889	0.787082
LSR	0.0630519	0.227763	0.047864	1.08383	0.922968	0.787082
PROK1	0.0630546	9.77237	0.883331	108.113	0.00984686	0.787082
TTC36	0.0631446	16.4343	0.857828	314.85	0.267538	0.787082
SIRPA	0.0632235	26.8997	0.834116	867.501	0.28728	0.787082
SEMG1	0.0632897	14.219	0.863329	234.187	0.239871	0.787082
TMEM38B	0.0633341	31.4061	0.825769	1194.46	0.171222	0.787082
THBS2	0.0634041	0.1288	0.0147961	1.1212	0.386572	0.787082
ABCG4	0.063433	11.5731	0.872003	153.596	0.867442	0.787082
DOPEY1	0.0634435	0.0710104	0.00434858	1.15957	0.00582854	0.787082
SLC7A10	0.0634883	0.185522	0.0313119	1.09921	0.0091873	0.787082
ABCC6P1	0.0635187	6.29973	0.901609	44.0175	0.570999	0.787082
RPS6KA6	0.063621	4.49315	0.918356	21.9832	0.463551	0.787693
PCBP1	0.0636739	0.00452265	1.5045e-05	1.35955	0.184755	0.787693
CYP7B1	0.0639519	22.1494	0.83554	587.158	0.447183	0.790147
XPOT	0.0639784	15.303	0.853407	274.407	0.0516909	0.790147
STK11IP	0.0640384	0.194276	0.0343022	1.10032	0.392269	0.790231
HS2ST1	0.0643076	0.111923	0.0109984	1.13896	0.257303	0.792296
UTY	0.0643571	0.171298	0.0264134	1.11091	0.131337	0.792296
DZIP3	0.0643815	0.039501	0.00128653	1.21282	0.339887	0.792296
PLEKHN1	0.0644186	10.5054	0.868682	127.047	0.397592	0.792296
MYT1	0.0647974	16.2377	0.842795	312.844	0.670779	0.795703
GALR2	0.0649586	4.93918	0.905721	26.9349	0.827525	0.795703
GHR	0.0649713	13.4132	0.851212	211.362	0.284702	0.795703
ELAC1	0.0650601	0.0198535	0.000308643	1.27707	0.0190668	0.795703
NELL1	0.0650958	0.0503139	0.0020998	1.20559	0.671756	0.795703
ZNF439	0.0651484	0.0765861	0.00499207	1.17495	0.0265545	0.795703
UBTD2	0.0651598	0.00201674	2.75452e-06	1.47657	0.475547	0.795703
COL3A1	0.0651764	0.0861515	0.00636204	1.16662	0.496025	0.795703
ITM2B	0.0651768	0.00401884	1.1418e-05	1.41453	0.0921191	0.795703
OGFRL1	0.0653387	0.0137701	0.000144442	1.31275	0.151812	0.795852
NFE2L1	0.0653865	341.131	0.689724	168720	0.0169561	0.795852
ATP8B2	0.06542	0.0179577	0.000249506	1.29247	0.322422	0.795852
SYT9	0.0654397	9.73342	0.864666	109.568	0.862333	0.795852
CD47	0.0654698	0.0429313	0.00150667	1.22329	0.0901091	0.795852
HNRNPF	0.0656002	0.106577	0.00983055	1.15545	0.622573	0.795852
TMEM71	0.0656054	0.355395	0.118146	1.06906	0.721661	0.795852
C8orf22	0.0656169	0.156524	0.0217335	1.12728	0.411402	0.795852
USP16	0.0657237	0.013373	0.000135088	1.32384	0.04835	0.79641
KLK5	0.0657699	44.4448	0.780827	2529.81	0.910912	0.79641
SHOX	0.0658332	241.477	0.698282	83506.5	0.508147	0.796529
PBRM1	0.0660205	0.00411368	1.17637e-05	1.43853	0.915856	0.798145
RSRC2	0.0661865	0.00161147	1.6895e-06	1.53704	0.0884324	0.798419
CKAP2	0.066199	6.8404	0.879301	53.2139	0.720878	0.798419
RS1	0.066204	9.21589	0.861903	98.5408	0.0110081	0.798419
ZNF461	0.0663201	4.54135	0.903077	22.8374	0.140679	0.798722
PARD3	0.0663646	7.22372	0.874972	59.6386	0.147487	0.798722
SLC2A4	0.0663902	18.4227	0.821114	413.334	0.64863	0.798722
C9orf91	0.0666017	139.412	0.713122	27254.4	0.911252	0.799237
SP8	0.0666168	0.0638415	0.00337529	1.20752	0.180731	0.799237
GAS2	0.066617	11.6891	0.844923	161.714	0.774358	0.799237
PMEPA1	0.0667046	0.0358883	0.00102416	1.25758	0.814799	0.799237
LOC154872	0.0667237	6.28144	0.880986	44.7868	0.97952	0.799237
ZNF134	0.0667552	0.0595318	0.00291648	1.21518	0.331399	0.799237
XPO5	0.0670538	28.6969	0.789926	1042.52	0.983266	0.801366
FAM120B	0.067085	0.000504634	1.49256e-07	1.70616	0.390194	0.801366
ERAL1	0.0671053	138.83	0.70641	27284.3	0.124566	0.801366
CEACAM4	0.0671964	20.1779	0.808356	503.674	0.876139	0.801366
NUP85	0.067259	32.952	0.780097	1391.92	0.67216	0.801366
MPHOSPH9	0.0672702	0.0117658	0.000100942	1.37143	0.802054	0.801366
FST	0.06731	5.04689	0.89106	28.5852	0.900588	0.801366
MT1M	0.0674062	4.37087	0.899738	21.2334	0.0894626	0.801758
EFTUD2	0.0674915	36.0802	0.772563	1685.02	0.432658	0.801758
DRAM1	0.0676229	34.1369	0.774242	1505.12	0.287165	0.801758
TTTY11	0.0676819	0.120086	0.0123612	1.16662	0.89521	0.801758
TM6SF1	0.0676985	5.91509	0.878664	39.8199	0.675333	0.801758
MLXIPL	0.0676995	0.125625	0.0135701	1.16296	0.649299	0.801758
ADD3	0.06772	0.0128168	0.000119591	1.3736	0.248107	0.801758
TSPAN7	0.0679232	0.169262	0.0251362	1.13977	0.330268	0.803313
FERMT3	0.067978	4.96157e-06	9.98712e-12	2.4649	0.944274	0.803313
TNFAIP3	0.0680897	0.00457939	1.40545e-05	1.4921	0.801772	0.803313
SERPINB4	0.0681147	15.2821	0.816398	286.064	0.783652	0.803313
TADA3	0.0682024	0.0112848	9.10829e-05	1.39815	0.0077271	0.803313
RNF139	0.0682692	0.0196156	0.000286517	1.34292	0.574315	0.803313
NELL2	0.0683444	0.138079	0.0164254	1.16075	0.5164	0.803313
SIN3A	0.0683865	0.00882701	5.45292e-05	1.42889	0.760617	0.803313
PODXL	0.0684281	25.7351	0.782241	846.661	0.644318	0.803313
UBA5	0.0684361	0.0710522	0.00413314	1.22145	0.16779	0.803313
ELMOD3	0.0686216	127.939	0.690382	23709.1	0.361117	0.803313
SLC38A7	0.0686905	56.8903	0.733667	4411.42	0.413993	0.803313
ZNF185	0.0687047	7.77527	0.854455	70.7526	0.818612	0.803313
LBH	0.0687129	0.00397353	1.03312e-05	1.52827	0.158075	0.803313
PPP2R2A	0.068784	313.806	0.642327	153308	0.899242	0.803313
ELP3	0.0688685	1531.73	0.567146	4.13685e+06	0.883983	0.803313
PPIL4	0.0689236	0.0946819	0.00746708	1.20056	0.460547	0.803313
PBX4	0.068992	3.17493	0.914031	11.0283	0.29268	0.803313
SLC4A7	0.0692448	0.00875633	5.27864e-05	1.45252	0.00836367	0.803313
RNF6	0.0692883	0.00305234	5.89739e-06	1.57982	0.517629	0.803313
SLC28A1	0.0693508	42.4473	0.743148	2424.52	0.0712789	0.803313
GRAMD2	0.0693658	11.62	0.82333	163.999	0.933771	0.803313
DEF6	0.0694082	0.00058021	1.86264e-07	1.80735	0.2258	0.803313
ADNP	0.069419	0.00511792	1.72243e-05	1.5207	0.0225934	0.803313
PART1	0.0694689	90.6323	0.698375	11761.9	0.642517	0.803313
TNPO3	0.0695335	162.774	0.6657	39800.8	0.0941832	0.803313
RCN2	0.0696531	0.0417741	0.001352	1.29074	0.0222969	0.803313
NEU1	0.0696599	45.4633	0.73575	2809.26	0.142413	0.803313
ZNF92	0.0696955	0.0118598	9.84137e-05	1.42923	0.0481893	0.803313
ZCWPW2	0.0698302	0.127979	0.0138646	1.18133	0.144251	0.803313
EMR2	0.0698879	14.3182	0.805474	254.523	0.0502489	0.803313
NAB1	0.0698913	0.0434999	0.00146655	1.29026	0.987287	0.803313
RPS28	0.0699016	15590.1	0.456028	5.32973e+08	0.142851	0.803313
DPM2	0.0699787	41.4932	0.737779	2333.61	0.579865	0.803313
DNAJC19	0.0699795	0.0290221	0.000630911	1.33503	0.3517	0.803313
ZNF143	0.0700209	0.0125889	0.000110808	1.43023	0.262958	0.803313
RRAS2	0.07003	0.144633	0.0178575	1.17142	0.229399	0.803313
BFSP2	0.0700551	4.14188	0.890096	19.2734	0.459737	0.803313
MAN1B1	0.0702432	44.3464	0.730948	2690.49	0.244183	0.803313
PRIM1	0.0702487	24.9208	0.766557	810.174	0.0606132	0.803313
ECE2	0.0702821	27.84	0.759243	1020.84	0.371491	0.803313
PRPF4B	0.0702974	0.0126499	0.000111408	1.43635	0.32346	0.803313
SHKBP1	0.0703204	0.00135105	1.05522e-06	1.72983	0.265487	0.803313
DDX51	0.0703535	0.00745373	3.69823e-05	1.50229	0.625722	0.803313
MYH8	0.0704129	0.0767562	0.0047572	1.23844	0.0161418	0.803313
TOLLIP	0.0704273	5.89538	0.862521	40.2952	0.228315	0.803313
CNIH3	0.0704296	0.131203	0.0145329	1.1845	0.420049	0.803313
FSD1L	0.0704424	8.52667	0.836288	86.9367	0.00641638	0.803313
TMEM115	0.0705062	197.059	0.642723	60418.2	0.914804	0.803426
SEMA4D	0.0707541	0.0463391	0.00165581	1.29684	0.201841	0.805428
EPX	0.0707902	14.7705	0.795947	274.097	0.329929	0.805428
IL9R	0.0709363	0.166734	0.02386	1.16514	0.624056	0.805785
DDX59	0.0709652	0.0118494	9.6123e-05	1.46072	0.592516	0.805785
CACNG4	0.0709919	88.802	0.681307	11574.5	0.220083	0.805785
ALCAM	0.0711355	0.0799446	0.0051419	1.24295	0.0393568	0.805785
PLA2G7	0.0712324	7.20501	0.843043	61.5771	0.0135046	0.805785
NOSIP	0.0713556	0.00622161	2.489e-05	1.55518	0.573128	0.805785
VSIG4	0.0714263	5.97772	0.855625	41.7626	0.733661	0.805785
P4HA3	0.0714679	27.4166	0.748809	1003.82	0.345302	0.805785
ANKRD22	0.0714761	12.8794	0.799837	207.391	0.0908548	0.805785
CCDC15	0.0714853	0.0391413	0.00115405	1.32753	0.544897	0.805785
CACNB3	0.0715981	12.5016	0.800973	195.126	0.611245	0.805785
NOS2	0.0716538	22.4084	0.760433	660.329	0.936613	0.805785
FAM24B	0.071736	0.334818	0.101769	1.10155	0.730803	0.805785
HDAC4	0.071779	0.0169337	0.000199825	1.43501	0.0246472	0.805785
RPS4X	0.0718104	8.48839e+29	0.00221827	3.24815e+62	0.982434	0.805785
PRDM7	0.0718795	11.8576	0.80256	175.192	0.759737	0.805785
CD300LG	0.0719384	0.0546424	0.00230403	1.2959	0.152706	0.805785
TMSB4X	0.0719452	1.58709e-20	4.31762e-42	58.3391	0.62041	0.805785
MAP6	0.072066	0.0760478	0.00459047	1.25984	0.0343357	0.805785
DUSP3	0.0720779	151.705	0.637327	36110.8	0.992982	0.805785
ONECUT2	0.0720823	6.01776	0.851277	42.5401	0.375647	0.805785
CACNA1F	0.0721724	8.93596	0.82099	97.2624	0.00191468	0.805785
ESCO2	0.0723219	0.0868074	0.00603825	1.24797	0.333263	0.805785
UBE3C	0.0724343	0.0263461	0.000498444	1.39257	0.00582481	0.805785
DPP8	0.0724652	0.0217707	0.000334341	1.41761	0.68156	0.805785
ACADL	0.0725083	22.483	0.752511	671.734	0.50597	0.805785
C20orf27	0.0725996	0.0475968	0.00171354	1.32209	0.959547	0.805785
ROR1	0.0727002	0.0673336	0.00353646	1.28202	0.271172	0.805785
PTPRC	0.0727261	0.00605686	2.29122e-05	1.60114	0.0364353	0.805785
AKT1	0.0727422	0.00408403	1.00421e-05	1.66093	0.275809	0.805785
GPATCH1	0.0727552	0.0285063	0.000585178	1.38865	0.961535	0.805785
LGALS13	0.0727594	11.1711	0.800304	155.933	0.968818	0.805785
CAPZA2	0.0728222	0.00368759	8.09652e-06	1.67952	0.492749	0.805785
CCR5	0.0728758	7.62787	0.828243	70.2504	0.73221	0.805785
CARD18	0.0728971	0.099583	0.00800518	1.23879	0.921209	0.805785
VASH1	0.0729604	108.396	0.646542	18173	0.125242	0.805785
KCNA10	0.0730669	54.6135	0.688019	4335.11	0.643577	0.805785
SCARA5	0.0731267	0.307605	0.0847243	1.11681	0.0577559	0.805785
SPRYD3	0.0732226	76.411	0.665042	8779.34	0.653042	0.805785
FBXO33	0.0733193	0.05773	0.00254583	1.3091	0.719331	0.805785
MAPK1	0.0734475	0.00151927	1.2466e-06	1.85157	0.262227	0.805785
AMBN	0.0734497	39.7103	0.705028	2236.66	0.497413	0.805785
MBD2	0.0735172	53.026	0.685238	4103.34	0.580018	0.805785
MOS	0.0735695	33.5841	0.715187	1577.06	0.235951	0.805785
ULBP1	0.073609	14.0318	0.776967	253.41	0.554892	0.805785
HOXC11	0.073674	9.10598	0.809296	102.458	0.60321	0.805785
KRT36	0.0737466	60.476	0.674298	5423.92	0.022966	0.805785
SNX19	0.0739573	0.0196607	0.000264184	1.46316	0.677382	0.805785
BSPRY	0.0739631	12.4278	0.78337	197.162	0.260047	0.805785
LPCAT1	0.0740721	0.00386171	8.68462e-06	1.71715	0.216307	0.805785
CDK4	0.0741219	103.821	0.635963	16948.9	0.133012	0.805785
CAPN9	0.0742152	8.14388	0.81448	81.4296	0.110653	0.805785
CCNB2	0.0742152	0.106511	0.00911223	1.24498	0.669438	0.805785
ZBTB38	0.0742858	0.0296135	0.000620889	1.41242	0.0637861	0.805785
PRR15	0.0744877	5.84505	0.839812	40.6812	0.101858	0.805785
TULP4	0.0746119	0.0133934	0.000116866	1.53493	0.750394	0.805785
AIFM1	0.0748346	46.3012	0.680963	3148.19	0.431475	0.805785
VWA1	0.074892	0.131792	0.0141713	1.22566	0.74579	0.805785
TMED6	0.0749185	0.292706	0.0757242	1.13143	0.516893	0.805785
C11orf70	0.0749567	18.7305	0.744586	471.179	0.416973	0.805785
KIAA2022	0.0750406	0.0665414	0.00336785	1.31472	0.280884	0.805785
GIMAP1	0.07509	0.0909343	0.0064882	1.27447	0.802274	0.805785
SH2D4A	0.0750988	11.5624	0.780604	171.262	0.369464	0.805785
EIF1B	0.0752054	69.3986	0.650029	7409.17	0.0613088	0.805785
FCN3	0.0752335	7.65311	0.813045	72.0378	0.0366422	0.805785
AUP1	0.0752719	22077.9	0.361073	1.34996e+09	0.869561	0.805785
GHDC	0.0752787	39.683	0.687307	2291.18	0.248108	0.805785
ATP2A3	0.0753392	0.0589929	0.00260676	1.33505	0.591364	0.805785
PAX3	0.0753925	0.0263683	0.000479337	1.45051	0.0597733	0.805785
ILK	0.0754051	0.0053383	1.66807e-05	1.70841	0.0827375	0.805785
UBAP2	0.0754917	16.1205	0.751682	345.72	0.98121	0.805785
FAM47B	0.075571	0.11593	0.0107653	1.24843	0.916368	0.805785
PDHA1	0.0756116	327.273	0.550361	194613	0.404125	0.805785
TMEM9B	0.0756429	0.0457364	0.00152126	1.37505	0.164931	0.805785
GPR132	0.0757034	0.140297	0.0160634	1.22534	0.595152	0.805785
LECT1	0.0757065	40.2045	0.682313	2369.01	0.371213	0.805785
STRN	0.0757356	0.00371865	7.74602e-06	1.78522	0.326533	0.805785
FOXI1	0.075764	10.8936	0.78063	152.018	0.974604	0.805785
CTXN1	0.0758219	0.100176	0.00790113	1.2701	0.79149	0.805785
VAMP1	0.075833	0.0103225	6.62338e-05	1.60875	0.10875	0.805785
TP53TG1	0.0758706	119.808	0.60761	23623.7	0.364148	0.805785
STEAP3	0.076027	15.6317	0.749891	325.846	0.351269	0.805785
NFXL1	0.0760315	0.0572168	0.00242633	1.34927	0.097386	0.805785
BIRC2	0.0761085	3.39379e-07	2.41049e-14	4.77822	0.310856	0.805785
PCMT1	0.0761454	0.000832141	3.28543e-07	2.10766	0.191352	0.805785
COL11A2	0.0761901	24.3963	0.714344	833.186	0.679901	0.805785
TRPM1	0.0762223	27.9767	0.703832	1112.05	0.100305	0.805785
SLC7A6	0.0762539	0.024604	0.000409439	1.4785	0.951701	0.805785
VARS2	0.0762971	102798	0.295253	3.5791e+10	0.00132619	0.805785
GPRC5C	0.0764983	25.6262	0.707987	927.564	0.276792	0.805785
LHX3	0.0765762	19.2025	0.729445	505.504	0.8073	0.805785
THOC5	0.0765802	62.8135	0.642714	6138.86	0.851143	0.805785
LIAS	0.0765857	0.118397	0.0111614	1.25592	0.881523	0.805785
SSX1	0.076733	0.185717	0.0287882	1.19808	0.863831	0.805785
APOD	0.0767931	3.03888	0.887306	10.4077	0.347668	0.805785
TIMM13	0.0768295	22.2444	0.715967	691.11	0.429504	0.805785
CDK5RAP2	0.0768362	37.4399	0.676859	2070.96	0.961312	0.805785
DOCK4	0.0768514	12.162	0.763917	193.625	0.137892	0.805785
ADCK1	0.0768721	0.0381124	0.00102111	1.42252	0.203808	0.805785
AGTRAP	0.076907	6.80846	0.812889	57.0251	0.165945	0.805785
C1QA	0.0769137	15.4264	0.744112	319.811	0.196384	0.805785
FGD6	0.0769188	0.258801	0.057877	1.15725	0.755313	0.805785
ICAM3	0.0769231	0.000209281	1.75338e-08	2.49794	0.465197	0.805785
C11orf71	0.0769357	17.5787	0.733513	421.276	0.29252	0.805785
ATG5	0.0769601	0.0103009	6.46768e-05	1.64061	0.0385415	0.805785
RIPK2	0.0769714	0.0208059	0.000284662	1.52069	0.897563	0.805785
RNF38	0.0769838	0.00384173	8.08142e-06	1.82628	0.292117	0.805785
MINA	0.0769938	100.83	0.606682	16757.8	0.273902	0.805785
USP14	0.0769976	52.2191	0.651465	4185.7	0.0887559	0.805785
AVPR1B	0.0770179	9.62123	0.782352	118.32	0.987308	0.805785
PSCA	0.0770836	8.60748	0.791434	93.6132	0.858205	0.805785
GBAS	0.0771773	0.0185774	0.000223495	1.5442	0.575984	0.805785
PBLD	0.0772163	0.0204175	0.000272601	1.52925	0.903661	0.805785
NDUFAF2	0.0772568	15.3703	0.741792	318.482	0.146776	0.805785
JMJD8	0.0772844	16477.7	0.345628	7.85565e+08	0.645479	0.805785
RPH3AL	0.077304	0.0399169	0.00111984	1.42284	0.503224	0.805785
ETV2	0.0773353	0.0694912	0.00360519	1.33946	0.197271	0.805785
TXNRD2	0.0773679	0.0240315	0.00038361	1.50547	0.0162505	0.805785
CPEB3	0.0774283	33.3877	0.679948	1639.45	0.510995	0.805785
PAN3	0.0774471	1.59282e-05	7.52409e-11	3.37193	0.432606	0.805785
PAX7	0.0774906	13.6162	0.749966	247.211	0.747554	0.805785
ZNF654	0.0775038	0.0433221	0.0013278	1.41346	0.181814	0.805785
FAM133A	0.0775349	4.20253	0.853481	20.6932	0.400972	0.805785
SWAP70	0.0775356	0.00431	1.01837e-05	1.8241	0.201915	0.805785
ANKLE2	0.0775898	0.0045075	1.11813e-05	1.8171	0.124294	0.805786
SCARNA17	0.077661	4.01276	0.857281	18.7829	0.869214	0.805963
RABEPK	0.0777333	46.3769	0.652952	3293.99	0.32826	0.806151
HFE2	0.0778585	14.9195	0.739693	300.925	0.26355	0.806728
FBXL17	0.0778974	0.0172627	0.000189359	1.57373	0.182847	0.806728
ASB8	0.0779637	0.0130697	0.000105107	1.62517	0.956955	0.806854
ABLIM2	0.0781255	7.50065	0.797071	70.583	0.803643	0.807396
PCDHGB5	0.0782937	16.9675	0.725804	396.66	0.299525	0.807396
COX18	0.0782939	40.1818	0.658323	2452.56	0.999545	0.807396
GLP1R	0.0783035	28.3885	0.684645	1177.11	0.425356	0.807396
ZBTB11	0.0783394	0.108224	0.00910279	1.28668	0.635064	0.807396
TANC2	0.0784585	0.129111	0.0132054	1.26234	0.541382	0.807396
C12orf45	0.0785166	18.1281	0.718655	457.282	0.102046	0.807396
GINS4	0.0787198	8.98254	0.777265	103.808	0.0518871	0.807396
MFSD8	0.0787366	0.0265543	0.000464828	1.51697	0.115593	0.807396
WDR16	0.0787388	14.7898	0.733887	298.054	0.26462	0.807396
HLA-F	0.0787997	0.000227024	1.96251e-08	2.62623	0.125693	0.807396
COL1A1	0.0788409	0.0114659	7.85602e-05	1.67346	0.801586	0.807396
NINJ1	0.0788991	21.4257	0.702015	653.92	0.00120283	0.807396
NSMCE1	0.0789732	207242	0.242526	1.77091e+11	0.1264	0.807396
GTF3C5	0.0790169	0.185622	0.0283467	1.2155	0.128249	0.807396
STOM	0.0790212	182.133	0.547036	60640.5	0.181681	0.807396
KIAA0430	0.0790413	5.04666e-05	8.08453e-10	3.15032	0.217897	0.807396
COL7A1	0.079151	4.15949	0.847135	20.4234	0.0608383	0.807396
LCOR	0.0792265	0.0144047	0.000126523	1.63999	0.0811751	0.807396
PPP1R1B	0.0792626	0.0829444	0.00514384	1.33748	0.346097	0.807396
PDE6B	0.0793303	0.217018	0.0393847	1.19582	0.138909	0.807396
PORCN	0.0795488	15.7118	0.722781	341.541	0.0414712	0.807396
BANK1	0.0795494	0.0675455	0.00332078	1.37389	0.649837	0.807396
HEXDC	0.0796131	7.07843	0.793632	63.1328	0.389215	0.807396
CYB5R4	0.079695	0.0651876	0.00307551	1.3817	0.0445055	0.807396
OPHN1	0.0797666	0.0505074	0.00178992	1.42521	0.0845633	0.807396
ZNF76	0.0797706	0.187858	0.0289382	1.21952	0.421773	0.807396
EPHA10	0.0797727	18.1294	0.70898	463.587	0.0285508	0.807396
KIF12	0.0797735	3.94281	0.849724	18.295	0.222899	0.807396
NR6A1	0.0797954	14.5816	0.727381	292.311	0.445925	0.807396
BCOR	0.0799135	0.00859185	4.18674e-05	1.76318	0.102657	0.807396
FAM89B	0.0800609	0.0356734	0.000853705	1.49067	0.960909	0.807396
BEX5	0.080062	0.122109	0.0115908	1.28641	0.190916	0.807396
FOXF2	0.0800783	46.6922	0.630918	3455.54	0.0605844	0.807396
ANKRD13A	0.0801067	0.0337608	0.000759151	1.5014	0.0334373	0.807396
PLA2G15	0.080167	12.1523	0.740743	199.364	0.310902	0.807396
ZNF287	0.0801999	0.0830757	0.00511659	1.34886	0.640152	0.807396
BCL11B	0.0802042	0.0988839	0.00740231	1.32094	0.0805438	0.807396
HAPLN2	0.0802339	0.0880216	0.00578227	1.33992	0.825332	0.807396
GUK1	0.0802703	54.6129	0.617421	4830.68	0.666803	0.807396
DERL3	0.0803395	11.3283	0.74586	172.058	0.100395	0.807396
PLSCR2	0.0803778	0.209078	0.0361754	1.20838	0.891849	0.807396
SLC35A5	0.080465	0.0273582	0.00048378	1.54713	0.294014	0.807396
ATXN2	0.0804665	0.0371027	0.000923256	1.49104	0.625096	0.807396
TP53	0.0804983	0.0973513	0.00714299	1.32679	0.810301	0.807396
TMEM136	0.0805805	14.1633	0.72429	276.958	0.637373	0.807396
CLEC12A	0.0806292	0.01137	7.49156e-05	1.72564	0.0076738	0.807396
NAGS	0.0806591	0.212038	0.0372102	1.20828	0.338823	0.807396
DGKA	0.0808128	0.0245763	0.00038352	1.57487	0.0229766	0.807396
FETUB	0.0808344	47.6485	0.622612	3646.53	0.125551	0.807396
BEND6	0.0808466	0.174842	0.024682	1.23854	0.564565	0.807396
USP51	0.0808969	4.06654	0.841683	19.6472	0.987416	0.807396
SFTA1P	0.0809382	3.67133	0.852153	15.8172	0.856058	0.807396
ZNF41	0.081003	0.0418601	0.00118503	1.47867	0.177843	0.807396
ADCY10	0.0810351	11.6984	0.738279	185.367	0.850108	0.807396
CD82	0.0811185	0.0213308	0.000282712	1.60943	0.104713	0.807396
CCNT2	0.0811347	0.0201646	0.000250834	1.62104	0.0582058	0.807396
IGSF21	0.0811769	2.72764	0.883093	8.42498	0.0550539	0.807396
CSF1	0.0812171	34.3767	0.644809	1832.72	0.589771	0.807396
FBXO17	0.0813657	99.0945	0.564028	17410	0.928388	0.808123
RUNDC3A	0.081426	4.52663	0.828223	24.7402	0.725925	0.808123
ORAI2	0.0814804	9.93069	0.750513	131.402	0.664551	0.808123
SEC14L1	0.0815491	21.6025	0.680492	685.778	0.516157	0.808123
RPS19	0.0815617	1.29893e+06	0.171336	9.84741e+12	0.692346	0.808123
POLD3	0.0817261	28.6946	0.655277	1256.54	0.0393384	0.808321
STRN3	0.0817577	0.0521314	0.00187283	1.45111	0.391285	0.808321
KAZALD1	0.0817988	0.180397	0.0262179	1.24125	0.293814	0.808321
TTC12	0.0818076	0.255275	0.0548487	1.1881	0.0504876	0.808321
KRT85	0.0818893	7.98847	0.7688	83.0069	0.0315849	0.808321
AMHR2	0.0820242	4.62034	0.823322	25.9285	0.072023	0.808321
DPEP2	0.0820359	0.308335	0.0818684	1.16126	0.397156	0.808321
CTSZ	0.082062	37.9051	0.629863	2281.13	0.344911	0.808321
SARS	0.0820705	281.513	0.488017	162391	0.667446	0.808321
MCM3AP	0.0822196	0.000151292	7.44089e-09	3.07615	0.424231	0.808679
PPP1R14C	0.0822451	0.271297	0.0622965	1.18148	0.740325	0.808679
CCDC113	0.0822698	6.76092	0.783101	58.3706	0.048729	0.808679
VEGFB	0.0823335	0.0460709	0.00143071	1.48354	0.274911	0.80873
MRI1	0.0824905	94.8404	0.556517	16162.5	0.706294	0.80873
FBXO30	0.0826316	0.0632517	0.00280008	1.42881	0.254705	0.80873
EIF4E3	0.0827694	0.0482019	0.00156759	1.48216	0.333237	0.80873
FPR1	0.0828411	12.1786	0.722502	205.284	0.122716	0.80873
IL15RA	0.0828557	18.9996	0.681797	529.461	0.0499809	0.80873
POP1	0.0828596	4.77301	0.816	27.9187	0.450069	0.80873
CEP135	0.082883	0.0155627	0.000140866	1.71934	0.902708	0.80873
PHF7	0.0829187	23.6619	0.662124	845.586	0.214148	0.80873
CARHSP1	0.0830408	0.00145845	9.0557e-07	2.34889	0.0776827	0.80873
NCALD	0.0830807	0.0611782	0.00259624	1.44161	0.805989	0.80873
UPRT	0.0831393	0.0155461	0.000139996	1.72634	0.248013	0.80873
TPP1	0.0831578	0.00850043	3.86577e-05	1.86916	0.409008	0.80873
WASL	0.0831641	8.50423	0.75512	95.7754	0.51023	0.80873
ZNF689	0.0832451	1115.29	0.397397	3.13007e+06	0.472609	0.80873
RUFY1	0.0833056	0.0213176	0.000273723	1.66022	0.550485	0.80873
FJX1	0.0836051	15.5005	0.694833	345.791	0.573215	0.80873
HIST1H4D	0.0836282	8.11953	0.757017	87.0876	0.606096	0.80873
RRN3	0.0836339	0.0368503	0.000875598	1.55088	0.0302933	0.80873
KPNB1	0.0836546	105989	0.214565	5.23559e+10	0.501284	0.80873
KCNK2	0.0836702	19.869	0.671811	587.631	0.0529531	0.80873
MBIP	0.0838287	0.0502277	0.00169146	1.4915	0.949758	0.80873
KRT2	0.0838632	8.44733	0.751663	94.9327	0.0384665	0.80873
HTRA3	0.083901	9.40793	0.74068	119.497	0.606265	0.80873
SCRN1	0.0839071	0.0793544	0.00448487	1.40408	0.0014251	0.80873
PPP2R2C	0.0839575	49.5305	0.59248	4140.68	0.107988	0.80873
OPN1SW	0.0841242	14.6726	0.696353	309.161	0.38217	0.80873
LBP	0.0841586	42.8139	0.602506	3042.35	0.00160129	0.80873
KIAA1328	0.0841698	0.0862781	0.00534873	1.39171	0.606786	0.80873
GTF2H4	0.0841987	0.149752	0.0173546	1.29221	0.439234	0.80873
TCP11	0.0843427	4.87653	0.806745	29.4771	0.0980915	0.80873
PDXK	0.0843766	107.011	0.530504	21585.7	0.0480125	0.80873
STX6	0.0844096	0.00638493	2.05256e-05	1.98617	0.870759	0.80873
MICALL1	0.0844207	0.182088	0.0263084	1.26029	0.437289	0.80873
TPD52L1	0.0844236	0.0834768	0.00497332	1.40115	0.968409	0.80873
DCUN1D5	0.0844246	0.0308582	0.000593671	1.60397	0.986338	0.80873
GATA6	0.0844958	19.5264	0.667348	571.338	0.581841	0.80873
RALGPS1	0.0845487	0.0339934	0.000728846	1.58546	0.342512	0.80873
SLC25A15	0.0845629	5.72677	0.788254	41.6057	0.758347	0.80873
ZNF589	0.0847099	0.0742003	0.00385651	1.42763	0.815383	0.80873
ATP7A	0.0847174	6.89552	0.767708	61.9353	0.0352013	0.80873
RRP8	0.084916	202.735	0.48139	85380.9	0.328922	0.80873
AIM1L	0.084984	15.6652	0.684296	358.613	0.536165	0.80873
PRL	0.0850949	23.5379	0.646112	857.484	0.73945	0.80873
TMEM130	0.085148	5.19891	0.795908	33.9595	0.137565	0.80873
ZNF708	0.0851994	0.0312968	0.000605871	1.61667	0.29995	0.80873
FBXL5	0.0852348	0.0203515	0.000241234	1.71694	0.226675	0.80873
RAB11A	0.0852573	0.00686793	2.36178e-05	1.99715	0.109063	0.80873
CADM3	0.0852851	10.3331	0.722845	147.712	0.359073	0.80873
PMFBP1	0.0853135	7.74936	0.752178	79.8382	0.74117	0.80873
SNX18	0.0853558	0.00928668	4.49548e-05	1.91842	0.903559	0.80873
ZNF680	0.0853685	0.0684395	0.00322399	1.45285	0.0179634	0.80873
RAB33A	0.0854425	0.179593	0.0253815	1.27076	0.112092	0.80873
PLA2R1	0.0854608	7.40644	0.756114	72.5489	0.706667	0.80873
ABCC13	0.0855316	5.95747	0.779091	45.555	0.226538	0.80873
CCDC94	0.0855328	0.18599	0.0273398	1.26527	0.875256	0.80873
RNF111	0.0856016	0.0244093	0.000354128	1.68249	0.198352	0.80873
CPA4	0.0856115	14.3417	0.688468	298.755	0.330172	0.80873
SNRPF	0.0856452	0.00620671	1.88836e-05	2.04004	0.181589	0.80873
S100P	0.0856516	5.55976	0.786067	39.3236	0.257169	0.80873
TRAF3IP2	0.0856565	0.0370548	0.00086468	1.58794	0.068118	0.80873
CALHM2	0.0856757	0.0466872	0.00141759	1.53761	0.377461	0.80873
ZDHHC22	0.0857414	107.271	0.518124	22209.1	0.500728	0.80873
SMARCA4	0.0857789	0.00409341	7.72697e-06	2.16851	0.154468	0.80873
HRSP12	0.0858847	10.5924	0.716656	156.558	0.989238	0.80873
CRTAP	0.085956	0.00446849	9.2898e-06	2.14939	0.0848335	0.80873
UPK2	0.0859652	4.0005	0.821918	19.4716	0.197199	0.80873
MUC15	0.0859802	9.44774	0.727751	122.651	0.899143	0.80873
ZNF585B	0.0860247	5.92881	0.777129	45.2316	0.216864	0.80873
TOX4	0.0861327	0.00768475	2.95723e-05	1.99698	0.549089	0.809234
BAK1	0.0862629	81.5468	0.534016	12452.6	0.733893	0.809268
C12orf65	0.0863532	118.825	0.505322	27941.3	0.413272	0.809268
PTDSS2	0.0864282	16.8451	0.667491	425.108	0.0912863	0.809268
FRYL	0.0864295	0.000139774	5.48405e-09	3.56248	0.0790713	0.809268
PRCD	0.0864573	4.331	0.810612	23.14	0.633366	0.809268
CEACAM1	0.0865002	9.68106	0.722137	129.786	0.258345	0.809268
RNF207	0.08666	17.3839	0.662893	455.882	0.73257	0.809268
TEX15	0.0866913	0.0302841	0.000554093	1.65519	0.501471	0.809268
UQCRC2	0.0867091	0.0056689	1.52457e-05	2.1079	0.0216469	0.809268
FIBCD1	0.0867109	12.5928	0.694067	228.476	0.00928135	0.809268
STX4	0.086825	479.989	0.409592	562485	0.0285944	0.809268
ODC1	0.0868307	1.97473e-05	8.14237e-11	4.78924	0.288065	0.809268
RAE1	0.086885	48.9909	0.569216	4216.51	0.497187	0.809268
PAPPA	0.0869247	6.09949	0.769448	48.3513	0.0118681	0.809268
RGSL1	0.086952	9.24254	0.724306	117.94	0.939241	0.809268
MAP2	0.0870503	0.219953	0.0388185	1.2463	0.484301	0.809676
DDAH1	0.0874298	0.117551	0.0100923	1.36919	0.711255	0.811651
ASCC1	0.0874976	15.7233	0.66694	370.684	0.394005	0.811651
COL6A3	0.0875445	0.0433085	0.00118159	1.58737	0.476668	0.811651
SCN2B	0.0875514	0.0353778	0.000765272	1.63548	0.287429	0.811651
ERMN	0.0875697	0.104631	0.00785119	1.39439	0.659493	0.811651
ELL3	0.0875898	0.0557442	0.00203072	1.5302	0.787536	0.811651
ACBD5	0.0878102	0.00987914	4.92445e-05	1.98189	0.507184	0.812426
MAP3K5	0.0879242	27.7797	0.610263	1264.55	0.127629	0.812426
RAB4B	0.0879432	4.39235	0.802557	24.0391	0.8777	0.812426
HTR4	0.0879547	94.5251	0.5085	17571.3	0.476899	0.812426
ETV1	0.0880666	11.3844	0.695871	186.248	0.0379056	0.812426
OR7A10	0.0881302	10.5795	0.703137	159.182	0.475177	0.812426
BMP6	0.0881791	17.6132	0.65128	476.33	0.694985	0.812426
PRB3	0.0881954	4.99421	0.78623	31.7237	0.623464	0.812426
KRCC1	0.0881954	0.00469798	9.90089e-06	2.2292	0.0247773	0.812426
NPTN	0.0882212	0.00350889	5.28456e-06	2.32986	0.491612	0.812426
CCNG1	0.0883293	0.000112257	3.21998e-09	3.91357	0.159677	0.812426
DNAJB13	0.0883419	22.3087	0.627526	793.083	0.538986	0.812426
PIGF	0.0883848	48.2085	0.558662	4160.05	0.316617	0.812426
PRELP	0.0885762	0.0933032	0.006086	1.43041	0.757235	0.812426
SDHAF1	0.0886397	49.5911	0.554298	4436.74	0.1657	0.812426
CEACAM8	0.0886497	19.0768	0.640337	568.331	0.510736	0.812426
NAP1L4	0.0887615	0.0542984	0.00189576	1.55521	0.0174346	0.812426
PCDP1	0.0887855	29.3783	0.598878	1441.17	0.816899	0.812426
RHAG	0.088841	18.1773	0.643739	513.274	0.869039	0.812426
CBFB	0.088842	0.0656821	0.00285293	1.51218	0.97715	0.812426
MKX	0.0889669	15.7192	0.657279	375.932	0.152878	0.812426
CHRNE	0.0890098	33.6728	0.584946	1938.4	0.423604	0.812426
GTF3A	0.0890793	1.37149e+11	0.0199056	9.44956e+23	0.482122	0.812426
PSG9	0.089094	53.623	0.544224	5283.53	0.254725	0.812426
ALPI	0.0891229	285.169	0.421344	193005	0.923458	0.812426
CDYL2	0.0892252	0.0101472	5.09498e-05	2.02091	0.923647	0.812426
LTV1	0.0894122	0.0246258	0.000342895	1.76856	0.68891	0.812426
STYXL1	0.0894265	10.4385	0.696859	156.362	0.133641	0.812426
RAD9A	0.0894283	7.13255	0.738937	68.8465	0.184479	0.812426
C11orf24	0.0894604	34.811	0.578642	2094.22	0.724095	0.812426
NUMBL	0.0894606	69.1148	0.520603	9175.62	0.542104	0.812426
INADL	0.0894833	0.0343618	0.000702151	1.6816	0.183601	0.812426
GML	0.0894842	8.93306	0.713448	111.85	0.712573	0.812426
CRIP2	0.0895295	0.12652	0.011634	1.3759	0.465805	0.812426
DNAI2	0.089692	0.121716	0.0106901	1.38585	0.526886	0.813404
EVX1	0.0897466	22.66	0.616237	833.246	0.757017	0.813404
FUT11	0.0898256	0.0442948	0.0012087	1.62326	0.73442	0.813624
CNTNAP4	0.0899178	0.173213	0.0228332	1.314	0.16867	0.813704
UBE2Q2	0.0899438	0.00616528	1.71979e-05	2.21019	0.579191	0.813704
LMO2	0.0901409	0.270151	0.0594603	1.2274	0.892191	0.814992
PTMA	0.0902492	0.000156701	6.20836e-09	3.95519	0.631073	0.815476
AQP4	0.0903268	10.6192	0.68972	163.498	0.191621	0.815681
IMPACT	0.0905898	5.78163	0.757647	44.1198	0.0921981	0.816261
SPIRE1	0.0906836	20.5758	0.619191	683.736	0.816642	0.816261
SLC25A44	0.0906978	109.114	0.475204	25054.1	0.976877	0.816261
TBX18	0.0907047	31.9448	0.577336	1767.55	0.128442	0.816261
C17orf59	0.0907543	0.191497	0.0282071	1.30006	0.579698	0.816261
CMTM6	0.0907902	0.0367969	0.000801207	1.68996	0.234405	0.816261
SIPA1L1	0.0908463	0.0446696	0.0012169	1.63972	0.715706	0.816261
E2F1	0.0908547	6.3935	0.744373	54.9144	0.0802178	0.816261
RNF146	0.0908846	0.00969989	4.4975e-05	2.092	0.180732	0.816261
PKIB	0.0909454	0.0941535	0.00608213	1.45753	0.326409	0.816315
C1orf87	0.0911091	15.1769	0.6471	355.955	0.146716	0.817291
BCL2L11	0.0912225	31.9332	0.573667	1777.56	0.328932	0.817814
VPRBP	0.0912789	0.0112712	6.18019e-05	2.05559	0.200272	0.817814
CYB5B	0.0913858	0.0239912	0.000315683	1.82328	0.148612	0.817814
KIAA0922	0.0914185	0.000479083	6.69723e-08	3.4271	0.49349	0.817814
KLC2	0.0914818	11.2977	0.676207	188.757	0.413357	0.817814
CCT8L2	0.0914971	7.89717	0.716352	87.0594	0.0200978	0.817814
FBXO15	0.0916255	4.27189	0.79052	23.0848	0.709647	0.818085
PSD3	0.0916374	0.0797718	0.00422551	1.50598	0.0393322	0.818085
HCFC2	0.0917127	0.0703814	0.00322091	1.53793	0.275679	0.818266
RALGAPB	0.0918786	0.00267381	2.72536e-06	2.62324	0.164314	0.818724
TTTY5	0.0920533	0.144986	0.015332	1.37105	0.778474	0.818724
ARPC4	0.0920614	0.176089	0.0233445	1.32825	0.632175	0.818724
FUCA2	0.0920876	39.0347	0.54921	2774.37	0.301165	0.818724
TRIM22	0.0921448	0.00191938	1.32269e-06	2.78523	0.339691	0.818724
CLEC16A	0.0921469	0.0385092	0.000869994	1.70456	0.177758	0.818724
WDR86	0.0921491	0.112763	0.00889444	1.4296	0.331692	0.818724
SHMT2	0.0922126	62.4782	0.507608	7690.04	0.0199026	0.818736
EZR	0.0922823	0.0443357	0.00117831	1.6682	0.553972	0.818736
CLDND1	0.0923668	0.0966173	0.00635499	1.46891	0.336127	0.818736
PFAS	0.0923876	0.0404709	0.000966069	1.69542	0.630393	0.818736
ABCB6	0.0924255	171.577	0.428432	68712.6	0.912884	0.818736
THY1	0.0925317	0.0639155	0.00259411	1.5748	0.985583	0.819189
PPARG	0.0926095	8.38746	0.703442	100.008	0.721888	0.819391
DIRAS3	0.0926734	0.0621674	0.0024395	1.58425	0.531665	0.819469
ZBED3	0.0927589	7.34465	0.718296	75.0998	0.186536	0.819738
PPP2R1B	0.0929842	72.54	0.489514	10749.6	0.839751	0.821241
PMM2	0.0930431	23.8262	0.588978	963.856	0.370152	0.821245
NCSTN	0.093095	24.0046	0.587898	980.14	0.990212	0.821245
CNBP	0.0933084	3.68511e-06	1.66196e-12	8.1711	0.0575945	0.822418
DAZAP2	0.093346	0.000287882	2.10602e-08	3.93518	0.238585	0.822418
TIMM10	0.0934048	175.574	0.419169	73541.4	0.00691829	0.822418
TADA2B	0.0936605	0.0076175	2.54289e-05	2.2819	0.112348	0.822418
SPAG4	0.0937065	9.28324	0.685729	125.674	0.979237	0.822418
RRP15	0.0937108	46.5312	0.521912	4148.5	0.702398	0.822418
PPP1CC	0.0937193	0.00118123	4.45483e-07	3.1321	0.0172646	0.822418
GGA2	0.0937383	0.00259619	2.45801e-06	2.74213	0.10496	0.822418
DDX4	0.0937758	23.3937	0.585937	934.002	0.84955	0.822418
XKR8	0.0937807	6.55609	0.726963	59.1259	0.331037	0.822418
SLAMF8	0.0940558	18.0842	0.610315	535.854	0.216152	0.823326
ABCC11	0.0941275	71.7037	0.481997	10666.9	0.507663	0.823326
UBE2N	0.0941538	0.0216662	0.000243857	1.925	0.393498	0.823326
ARHGEF10L	0.0943543	11.9972	0.652838	220.474	0.0829743	0.823326
IGFL2	0.0943638	4.00622	0.788019	20.3673	0.201138	0.823326
TAF7	0.0944382	1.57503e-06	2.49441e-13	9.94509	0.471865	0.823326
NDUFAF3	0.0944684	0.0357226	0.00071937	1.77392	0.585014	0.823326
LMO1	0.0944932	8.00464	0.699069	91.6567	0.799639	0.823326
RDH8	0.0945022	14.309	0.632504	323.708	0.30579	0.823326
EP300	0.0946159	0.0349104	0.000683114	1.78409	0.252109	0.823326
CRY2	0.0946733	0.201468	0.0307757	1.31887	0.476634	0.823326
ATP5H	0.0946844	3.58538e+07	0.0494998	25969680984801928	0.500836	0.823326
SNTB2	0.0947088	360.228	0.361419	359041	0.541951	0.823326
NTM	0.0947487	5.04546	0.755755	33.6838	0.0597493	0.823326
COPE	0.0948345	0.00971902	4.23097e-05	2.23257	0.0407753	0.823326
CNTN3	0.0949871	6.09205	0.730385	50.8131	0.538405	0.823326
KIAA0247	0.0949989	0.0533112	0.00170692	1.66504	0.075236	0.823326
FNDC7	0.0950293	6.80874	0.716191	64.7298	0.223868	0.823326
GPR32	0.095223	8.3741	0.689849	101.654	0.932215	0.823326
STX11	0.0953513	0.100026	0.00668473	1.49673	0.0755071	0.823326
LILRA4	0.0954704	0.302121	0.0739754	1.23388	0.806463	0.823326
PEX3	0.0954858	0.0414605	0.000982806	1.74904	0.00493035	0.823326
ALDH4A1	0.0955274	0.0602762	0.00221746	1.63847	0.261419	0.823326
SLC25A37	0.0955605	14.7763	0.622681	350.645	0.470756	0.823326
CSF3	0.0956855	0.0196721	0.000193562	1.99931	0.64135	0.823326
LMTK2	0.0957313	0.0152375	0.000110941	2.09285	0.415628	0.823326
TGM5	0.0957367	10.8253	0.656732	178.441	0.277127	0.823326
C1orf216	0.0957883	27.6686	0.556135	1376.56	0.035857	0.823326
ZNF526	0.0957979	30.5594	0.54639	1709.17	0.756877	0.823326
SLC5A9	0.0958714	8.60579	0.683177	108.405	0.0512544	0.823326
KCNAB3	0.0959539	14.4428	0.622862	334.898	0.383517	0.823326
HAUS8	0.0960641	11.2597	0.650358	194.938	0.251954	0.823326
AVP	0.0961694	8.68188	0.68056	110.754	0.142572	0.823326
EARS2	0.0961772	44.7836	0.508099	3947.21	0.847087	0.823326
TOM1L1	0.0962117	5.10067	0.747981	34.7827	0.211792	0.823326
CHKB	0.0962455	0.00809048	2.77248e-05	2.36091	0.150469	0.823326
RAC2	0.096259	0.00292458	3.02076e-06	2.83145	0.841385	0.823326
MTHFD2	0.0962627	10.9586	0.652398	184.076	0.995537	0.823326
SLC12A1	0.0963605	43.7117	0.509046	3753.51	0.982482	0.823326
MRPS33	0.0963871	37.1555	0.52387	2635.25	0.773024	0.823326
TNFRSF1B	0.0963881	0.0215195	0.000233082	1.9868	0.638038	0.823326
KCNK15	0.096396	5.67512	0.733059	43.9351	0.836194	0.823326
GIMAP6	0.0966341	0.0654256	0.00262225	1.63238	0.359871	0.823326
ALKBH8	0.0966948	0.0960037	0.00604595	1.52444	0.00318403	0.823326
SLC35F5	0.0968175	0.0379262	0.000797219	1.80426	0.164614	0.823326
POU2F3	0.0968274	0.0295619	0.000463015	1.88742	0.268776	0.823326
SOX9	0.096922	0.270315	0.0576848	1.26671	0.462662	0.823326
GLOD5	0.0971082	17.9069	0.592543	541.155	0.827528	0.823326
KCMF1	0.0971432	90.4308	0.441478	18523.5	0.0957262	0.823326
PTPRCAP	0.097163	3.72701e-09	4.09497e-19	33.9211	0.920032	0.823326
TMX1	0.0971674	0.03298	0.000585358	1.85814	0.384349	0.823326
LIPA	0.0972018	96.2135	0.436127	21225.6	0.602496	0.823326
RNF14	0.0972258	0.0120302	6.4794e-05	2.23362	0.359051	0.823326
UBXN2B	0.0972425	0.0680705	0.00284236	1.63019	0.339067	0.823326
HLCS	0.0973879	0.0241271	0.000295136	1.97237	0.268071	0.823326
PTS	0.0975191	0.0358814	0.000700672	1.83749	0.663976	0.823326
MAS1L	0.0975426	25.2027	0.554175	1146.17	0.204131	0.823326
PLA2G12A	0.097591	0.0387826	0.000829595	1.81304	0.291356	0.823326
FAM153A	0.0976048	9.70222	0.659575	142.718	0.942907	0.823326
SIGMAR1	0.0976684	27.5664	0.544359	1395.97	0.298507	0.823326
PITX3	0.0977049	45.7136	0.495898	4214.04	0.451676	0.823326
ZNF681	0.0977413	0.0786155	0.00387442	1.59518	0.0295726	0.823326
OSGEPL1	0.0977643	0.0703114	0.00303561	1.62856	0.0462795	0.823326
SH2D1A	0.0977729	0.0823129	0.00428224	1.58221	0.0215603	0.823326
GRIK4	0.0978172	7.09887	0.697389	72.261	0.594987	0.823326
NFYC	0.097841	0.0222515	0.000245854	2.01392	0.418672	0.823326
SNRNP40	0.0979219	0.0603061	0.00216767	1.67776	0.670641	0.823326
ZNF443	0.0979666	0.0335793	0.000603013	1.86989	0.022653	0.823326
APBA2	0.0979851	0.270455	0.0574673	1.27282	0.195611	0.823326
HYAL1	0.0980427	23.8452	0.556691	1021.38	0.480994	0.823326
DDX54	0.0980925	8.19393	0.677846	99.0498	0.984304	0.823326
CDH11	0.098098	0.128872	0.0113712	1.46054	0.27459	0.823326
ANXA2P1	0.0981633	48.1874	0.488058	4757.67	0.410441	0.823326
ATP8B4	0.0982363	17.3096	0.58947	508.291	0.677544	0.823326
ITGA7	0.0982586	6.62436	0.704242	62.3112	0.118465	0.823326
SH3BGRL3	0.0982728	6.81378e-06	5.1096e-12	9.08633	0.595096	0.823326
PLAC4	0.0983093	30.7197	0.529539	1782.12	0.292249	0.823326
SDCCAG8	0.0983598	0.00741457	2.21018e-05	2.48739	0.901867	0.823326
GUCA1C	0.0983704	29.7814	0.532208	1666.51	0.768339	0.823326
SCNN1B	0.0984227	6.43905	0.707195	58.6279	0.520718	0.823326
APH1A	0.0984413	0.0227404	0.000255748	2.02201	0.777139	0.823326
DIXDC1	0.0984487	0.220072	0.0365401	1.32544	0.421102	0.823326
PDCD11	0.098476	124.821	0.407047	38276.5	0.0685753	0.823326
KIAA1191	0.0987352	1.92664e-05	4.86707e-11	7.62667	0.0994582	0.82383
RHOA	0.0987476	8.04444	0.676891	95.6032	0.39891	0.82383
IL27RA	0.0987499	0.0863998	0.00472024	1.58147	0.783193	0.82383
AGA	0.0987948	0.00902333	3.37056e-05	2.41564	0.340848	0.82383
TXNDC16	0.0988326	0.134949	0.0125105	1.45568	0.594048	0.82383
CDC42SE2	0.0988907	2.77083e-10	1.23467e-21	62.1822	0.120265	0.82383
LY6H	0.0989714	44.8223	0.489316	4105.8	0.179813	0.82383
PTRF	0.0991841	0.0554899	0.00178424	1.72573	0.954789	0.82383
SNRNP25	0.099482	0.0169389	0.000132341	2.16808	0.055423	0.82383
CEACAM6	0.0995056	3.83473	0.774794	18.9794	0.131363	0.82383
MMD2	0.0995962	14.2354	0.603506	335.78	0.880898	0.82383
PPIL1	0.0996628	5.04003	0.734961	34.5622	0.462103	0.82383
ADARB2	0.0996775	7.69252	0.678042	87.2732	0.732968	0.82383
STAC2	0.0997046	11.2217	0.63085	199.615	0.0243616	0.82383
NOB1	0.0997575	22.2223	0.553527	892.15	0.0402776	0.82383
XCL1	0.0998864	0.146204	0.0148005	1.44424	0.840266	0.82383
CACNA2D1	0.0998954	5.05182	0.733663	34.7856	0.815325	0.82383
CRYBB1	0.0999423	16.1699	0.587068	445.377	0.706369	0.82383
AGFG1	0.0999593	0.00305696	3.08453e-06	3.02965	0.703224	0.82383
PTPN11	0.100126	0.0703852	0.00297618	1.66457	0.207958	0.82383
MIF4GD	0.100142	351.085	0.324409	379955	0.335721	0.82383
MRPL18	0.100151	0.00684983	1.8013e-05	2.6048	0.35389	0.82383
WDR61	0.100181	0.114571	0.00865558	1.51654	0.381929	0.82383
ZNF493	0.100188	0.0130469	7.39183e-05	2.30285	0.0924627	0.82383
NSUN4	0.100211	152.733	0.380191	61356.9	0.801653	0.82383
GTF2A2	0.100239	369.021	0.320677	424653	0.570898	0.82383
TRIM11	0.100256	34.6273	0.505481	2372.1	0.526659	0.82383
RBP7	0.100279	3.57646	0.782403	16.3484	0.0956951	0.82383
SERPINE1	0.100289	0.210194	0.0327179	1.35037	0.156153	0.82383
PCOLCE	0.100367	0.0723123	0.00315072	1.65964	0.884201	0.82383
KPTN	0.100368	9.19703	0.651849	129.762	0.270058	0.82383
CAMKV	0.100399	6.72577	0.692256	65.3457	0.802295	0.82383
ADH4	0.100418	79.4895	0.4297	14704.6	0.0210751	0.82383
P2RX4	0.100419	0.158575	0.017623	1.42688	0.592082	0.82383
CYB5R3	0.100551	0.000253735	1.29712e-08	4.96339	0.155577	0.823882
CSGALNACT2	0.100587	0.125799	0.0105931	1.49394	0.500532	0.823882
ZNF682	0.100646	0.0980188	0.00612483	1.56865	0.0960433	0.823882
OXR1	0.100679	0.0299473	0.000454144	1.97479	0.799813	0.823882
G6PC	0.100702	25.3206	0.534166	1200.25	0.369697	0.823882
CSTF3	0.10108	0.019508	0.00017636	2.15787	0.567129	0.824687
LSG1	0.101132	18.9933	0.562312	641.539	0.61798	0.824687
SH3BP4	0.101191	0.0578222	0.00191367	1.74712	0.937605	0.824687
MRPL55	0.101199	75.7031	0.428653	13369.7	0.00579149	0.824687
CYP26B1	0.101228	0.181576	0.0236036	1.39681	0.174626	0.824687
GGT5	0.101257	0.20809	0.0318342	1.36023	0.154411	0.824687
CYP39A1	0.101372	7.09749	0.680541	74.0211	0.172178	0.824687
SEC23A	0.1014	0.055531	0.00174741	1.76472	0.600505	0.824687
LTA	0.10147	0.301912	0.0720177	1.26568	0.190322	0.824687
TMEM50B	0.10156	0.00770094	2.27322e-05	2.60883	0.411208	0.824687
PCDHGC4	0.101585	0.165517	0.0192175	1.42558	0.900218	0.824687
DNMT3A	0.101588	13.0706	0.602464	283.569	0.777852	0.824687
FAM127A	0.101661	26.8516	0.522305	1380.44	0.703622	0.824687
C3orf38	0.101701	0.0128587	6.99662e-05	2.36323	0.917994	0.824687
SEC14L3	0.101716	0.0366156	0.000697475	1.92223	0.686065	0.824687
GDPD1	0.101965	9.98338	0.633406	157.352	0.150261	0.824687
RND2	0.102095	44.0194	0.471034	4113.73	0.146881	0.824687
ZNF35	0.10213	35.3035	0.491954	2533.44	0.427373	0.824687
SNAPC3	0.10216	0.0930612	0.00539728	1.60458	0.00382968	0.824687
RENBP	0.102203	5.41722	0.714106	41.0952	0.0534583	0.824687
INSR	0.102271	11.7214	0.611936	224.521	0.448256	0.824687
INPPL1	0.102272	393.899	0.303479	511258	0.681801	0.824687
APEX2	0.102385	89.4506	0.407215	19649.1	0.710236	0.824687
GPX2	0.102461	9.20176	0.641268	132.039	0.389415	0.824687
CHML	0.102598	0.0366246	0.000690769	1.94184	0.569041	0.824687
KPNA3	0.10261	28.4052	0.510837	1579.47	0.0594804	0.824687
PAOX	0.102723	24.4654	0.52571	1138.57	0.5455	0.824687
MYL3	0.102747	7.63371	0.664353	87.7147	0.363436	0.824687
C12orf4	0.10275	31.4347	0.499709	1977.43	0.938669	0.824687
CMA1	0.102785	10.8758	0.618489	191.246	0.0626354	0.824687
CXCL10	0.102802	6.59883	0.683867	63.6739	0.035268	0.824687
CDKL3	0.102874	10.5264	0.622113	178.109	0.43764	0.824687
TMPRSS11D	0.102894	0.09028	0.00501785	1.6243	0.897005	0.824687
GTF2A1	0.102902	0.0213146	0.000209022	2.17352	0.704755	0.824687
ATP5S	0.102951	0.0222188	0.000228894	2.15678	0.173401	0.824687
C18orf8	0.102955	0.0361552	0.000668665	1.95494	0.418272	0.824687
PSMC3IP	0.102975	22.0387	0.535416	907.155	0.81088	0.824687
PNRC2	0.102988	0.0746591	0.0032998	1.68919	0.0818656	0.824687
ZDHHC8	0.103029	28.0777	0.509534	1547.21	0.00989447	0.824687
RBL2	0.103079	0.0523691	0.00150991	1.81635	0.0744107	0.824687
CACNA1H	0.103083	7.42061	0.66658	82.6089	0.100079	0.824687
METTL7A	0.103166	70.7196	0.421868	11855	0.29545	0.824687
CYP2A13	0.103264	0.100448	0.00632816	1.59442	0.0247568	0.824687
FAM160B1	0.103264	0.0177752	0.000139425	2.26614	0.541959	0.824687
SBF1	0.103294	0.00196113	1.08421e-06	3.54731	0.134029	0.824687
SCG3	0.103445	23.4156	0.526169	1042.04	0.914896	0.825129
PDE3B	0.103515	0.136261	0.012367	1.50134	0.941655	0.825129
CNTN2	0.10363	0.13184	0.0114906	1.5127	0.194218	0.825129
CASP5	0.103632	3.70975	0.765056	17.9886	0.345494	0.825129
ANXA7	0.103656	0.00147417	5.73372e-07	3.79015	0.0162996	0.825129
LRRIQ3	0.103782	0.0940122	0.0054459	1.62293	0.845337	0.825129
HARBI1	0.103855	12.5016	0.595741	262.344	0.02855	0.825129
SLC6A13	0.104059	12.1825	0.597842	248.248	0.184676	0.825129
ADH7	0.104122	10.364	0.617748	173.877	0.699849	0.825129
SLC30A9	0.104142	0.0121049	5.9006e-05	2.48329	0.436362	0.825129
IAPP	0.104171	19.7863	0.540433	724.412	0.155198	0.825129
LYRM1	0.10428	0.00279524	2.31966e-06	3.36832	0.295513	0.825129
AKR1A1	0.104304	1850.03	0.211311	1.6197e+07	0.0970853	0.825129
MAGEB2	0.10433	3.87727	0.75569	19.8933	0.82331	0.825129
G6PC2	0.104335	38.4926	0.470164	3151.4	0.644988	0.825129
PLAC9	0.104375	5.20131	0.71098	38.0512	0.96327	0.825129
RHBDL1	0.104392	9.44208	0.628391	141.875	0.709225	0.825129
S100A7	0.104463	0.0269199	0.000342684	2.11472	0.466723	0.825129
PROCR	0.104472	8.48308	0.64209	112.076	0.861286	0.825129
SLC10A4	0.104522	0.101392	0.00639538	1.60745	0.00443255	0.825129
ELMO2	0.104561	0.0641909	0.00233065	1.76795	0.289748	0.825129
ENKUR	0.104569	0.223188	0.0364888	1.36515	0.693171	0.825129
LCP2	0.104694	0.0225753	0.000231661	2.19996	0.584963	0.825601
ERGIC1	0.10478	152.529	0.350952	66291.1	0.295817	0.825601
SLC6A12	0.104795	16.5603	0.557221	492.165	0.0431928	0.825601
STX16	0.104886	0.0526793	0.00150159	1.84812	0.367897	0.82588
ITGA6	0.104984	0.137909	0.012571	1.51292	0.400787	0.826213
MTL5	0.105144	6.46578	0.676295	61.8166	0.0888231	0.826515
OGN	0.105248	0.0791102	0.00367447	1.70322	0.590847	0.826515
ZNF540	0.105401	0.0584298	0.00187811	1.81781	0.00520823	0.826515
CCDC7	0.105406	25.6378	0.505228	1300.99	0.548193	0.826515
FHL2	0.105496	0.177941	0.0220055	1.43886	0.94009	0.826515
NR3C1	0.105544	0.00275099	2.18206e-06	3.46824	0.516256	0.826515
FAM71E1	0.105547	5.72008	0.692194	47.269	0.439094	0.826515
ZFP3	0.105591	0.164173	0.0184058	1.46437	0.766154	0.826515
ZNF626	0.105618	0.187995	0.0248309	1.4233	0.0761644	0.826515
CREB1	0.105673	0.0254366	0.00029775	2.17303	0.00340017	0.826515
LOC100130987	0.105776	16.2054	0.55445	473.65	0.406169	0.826515
ZRSR2	0.10584	24.1391	0.509228	1144.27	0.977803	0.826515
TRAP1	0.10591	11.1993	0.598899	209.425	0.107549	0.826515
MYH9	0.105924	0.00179262	8.39471e-07	3.82797	0.321796	0.826515
LPCAT2	0.105937	16.0244	0.554909	462.744	0.254482	0.826515
TSEN2	0.105969	0.122691	0.00963992	1.56153	0.42137	0.826515
SPINK2	0.106082	0.392267	0.126088	1.22036	0.709834	0.826515
BAZ2A	0.106085	22.6487	0.51478	996.47	0.614508	0.826515
DCAF15	0.106194	0.0552064	0.00164353	1.85439	0.498274	0.826515
NLK	0.10622	0.0934467	0.00526701	1.65792	0.184208	0.826515
CYP46A1	0.106255	0.26832	0.0543721	1.32412	0.753903	0.826515
GIP	0.106273	0.0716927	0.00292839	1.75518	0.754071	0.826515
PLEKHO1	0.106299	0.00754252	2.00333e-05	2.83975	0.793218	0.826515
MT1E	0.106482	13.7021	0.570829	328.904	0.000398249	0.827503
SCN1B	0.10661	7.31852	0.652322	82.1079	0.964811	0.827785
FBXO46	0.10663	0.0255552	0.000297189	2.19748	0.748039	0.827785
DHCR24	0.106804	8.98914	0.623238	129.653	0.491885	0.828705
FGFR2	0.106905	11.0823	0.59527	206.321	0.00517676	0.828842
HEATR5B	0.106994	0.00709654	1.72975e-05	2.91145	0.011028	0.828842
ZBTB8A	0.107086	0.191009	0.0255041	1.43053	0.81306	0.828842
DENND5A	0.107251	0.0710738	0.00284708	1.77427	0.990073	0.828842
CD7	0.107317	0.152624	0.0154889	1.50393	0.804415	0.828842
FOXN1	0.107438	66.1013	0.401875	10872.5	0.805703	0.828842
EOMES	0.10744	0.00189294	9.16243e-07	3.91077	0.845628	0.828842
FXYD1	0.107455	10.0637	0.605107	167.371	0.139372	0.828842
PRKG2	0.107573	5.49527	0.689762	43.7803	0.0595057	0.828842
GPAM	0.107588	0.112202	0.00781406	1.61111	0.0253174	0.828842
VPREB3	0.107612	0.180393	0.0223983	1.45286	0.434781	0.828842
QRSL1	0.107642	0.189763	0.0250563	1.43716	0.0258071	0.828842
C5orf30	0.107729	17.0341	0.538191	539.142	0.195412	0.828842
FSHB	0.107781	10.2153	0.601564	173.47	0.120917	0.828842
CRYBB2	0.108018	4.9842	0.702857	35.3447	0.0728838	0.828842
LHCGR	0.108046	6.39165	0.665391	61.3973	0.484265	0.828842
LGR5	0.108187	9.2765	0.612459	140.505	0.67472	0.828842
S1PR5	0.108342	11.2102	0.586703	214.196	0.514917	0.828842
TOPBP1	0.108504	0.00350924	3.52725e-06	3.49132	0.872397	0.828842
SCAMP3	0.108506	91.8328	0.367941	22920.2	0.147751	0.828842
TRIB3	0.108533	12.6028	0.570785	278.265	0.62592	0.828842
IRF2	0.108549	0.0319611	0.000476693	2.14292	0.96747	0.828842
GZMM	0.10855	0.271627	0.0552907	1.33442	0.15028	0.828842
REPS2	0.108707	25.8857	0.485786	1379.35	0.151085	0.828842
FZD6	0.108834	0.225987	0.0366907	1.39191	0.00511804	0.828842
TMEM37	0.108891	3.45874	0.758705	15.7676	0.725998	0.828842
DPM3	0.108919	11.5427	0.580094	229.675	0.77176	0.828842
RFXAP	0.108946	0.0553439	0.00160764	1.90524	0.439194	0.828842
ZNF362	0.109023	0.00615502	1.21752e-05	3.1116	0.88018	0.828842
FSD2	0.109227	0.286338	0.061982	1.3228	0.0348598	0.828842
ABCD4	0.109289	0.143062	0.0132422	1.54556	0.37254	0.828842
LOC389332	0.109297	5.63695	0.678914	46.803	0.817543	0.828842
HOXB8	0.109322	0.199591	0.0277651	1.43478	0.767399	0.828842
ZNF776	0.109451	0.0353517	0.000590185	2.11755	0.302673	0.828842
GLB1L2	0.109474	4.79553	0.703267	32.7004	0.572464	0.828842
MORF4L1	0.109607	0.000766095	1.16817e-07	5.0241	0.61523	0.828842
ULBP2	0.109649	6.38703	0.658696	61.9317	0.718806	0.828842
CD59	0.109652	0.0385963	0.000715868	2.08093	0.547229	0.828842
HIF1A	0.109782	1.60673e-05	2.13941e-11	12.0669	0.930489	0.828842
STATH	0.109797	3.53728	0.751946	16.6399	0.517625	0.828842
KCND3	0.109895	118.383	0.339967	41223.5	0.868609	0.828842
IL5RA	0.110002	43.9606	0.424682	4550.56	0.740082	0.828842
ERP27	0.110005	0.0161918	0.000103088	2.54319	0.0770709	0.828842
HMGB4	0.110021	11.2701	0.577837	219.811	0.771757	0.828842
CD300C	0.110027	6.27337	0.659785	59.6485	0.930593	0.828842
FBXL20	0.110107	0.0205699	0.000175397	2.41237	0.371001	0.828842
ZNF483	0.110212	0.129131	0.0104756	1.59177	0.814567	0.828842
ZNF44	0.11024	0.140333	0.0126057	1.56227	0.244438	0.828842
C20orf166	0.110305	11.5281	0.573509	231.727	0.624491	0.828842
CDH26	0.110329	27.2647	0.471415	1576.88	0.293405	0.828842
KIAA0355	0.110369	0.12537	0.00979729	1.60429	0.243157	0.828842
SPATA12	0.110409	4.13488	0.723748	23.6231	0.132909	0.828842
APOA1	0.110436	6.59061	0.65072	66.751	0.687349	0.828842
RANGRF	0.1105	0.0610076	0.00196666	1.89251	0.428194	0.828842
STAC3	0.110508	0.249099	0.0451907	1.37308	0.61977	0.828842
PRKACA	0.110601	0.0472104	0.00110964	2.00861	0.581604	0.828842
EPB41L1	0.110619	0.0662939	0.00236406	1.85904	0.0222469	0.828842
RGMB	0.110634	25.6407	0.47642	1379.97	0.4635	0.828842
RBM12	0.110739	0.00189521	8.55341e-07	4.19928	0.85645	0.828842
GMPPA	0.110899	22.8554	0.487716	1071.05	0.494862	0.828842
COCH	0.110924	4.27167	0.716552	25.4652	0.58531	0.828842
PKP4	0.110985	0.0297244	0.000393923	2.24293	0.70046	0.828842
CDKN2A	0.111005	11.0506	0.575709	212.113	0.342014	0.828842
TCF20	0.111022	0.00781987	2.00483e-05	3.05014	0.219333	0.828842
TAF1D	0.111063	0.00883267	2.62864e-05	2.96792	0.489437	0.828842
CXCL16	0.111074	49.9655	0.406626	6139.68	0.0105687	0.828842
UQCRC1	0.111092	0.0528309	0.00141866	1.96742	0.296218	0.828842
CDC20B	0.111115	0.0433154	0.000910822	2.05992	0.22335	0.828842
GABRR1	0.11113	30.1574	0.456418	1992.63	0.983501	0.828842
FECH	0.111169	28.4599	0.462335	1751.9	0.0421075	0.828842
DNAJC3	0.111311	114.519	0.334693	39183.7	0.624048	0.828842
LOC728024	0.11146	4.08753	0.721959	23.1425	0.731719	0.828842
TNFRSF21	0.111509	0.194274	0.0258257	1.46142	0.911513	0.828842
PDIK1L	0.111637	0.083663	0.00393635	1.77817	0.672818	0.828842
MRPS17	0.111637	41.3684	0.421627	4058.9	0.184941	0.828842
RBBP8	0.111672	16.1634	0.524171	498.417	0.294669	0.828842
ASAP1	0.111953	0.0284094	0.000351919	2.29341	0.455249	0.828842
GBE1	0.11197	0.174943	0.0203833	1.50147	0.663466	0.828842
CCDC12	0.111971	0.0118516	4.99413e-05	2.81253	0.0558733	0.828842
GALNT2	0.111979	12.8875	0.550976	301.445	0.720756	0.828842
BCL9	0.111994	0.0828423	0.0038389	1.78771	0.393255	0.828842
[truncated: 12,883 more rows]
